# Supplementary material for: Second-Generation Antipsychotic Drugs for Patients with Schizophrenia: Systematic Literature Review and Meta-analysis of Metabolic and Cardiovascular Side Effects
Source: PubMed Central journal article supplement — Clin Drug Investig. 2021 Mar 9;41(4):303–19. doi: 10.1007/s40261-021-01000-1 (PMC8004512; doi:10.1007/s40261-021-01000-1), 2021-03-09
Supplement: 40261_2021_1000_MOESM1_ESM.pdf [file 40261_2021_1000_MOESM1_ESM.pdf]

**Clinical Drug Investigation**

**SECOND-GENERATION ANTIPSYCHOTIC DRUGS FOR PATIENTS WITH SCHIZOPHRENIA:  
SYSTEMATIC LITERATURE REVIEW AND META-ANALYSIS OF METABOLIC AND  
CARDIOVASCULAR SIDE EFFECTS**

Carla Rognoni<sup>1</sup>, Arianna Bertolani<sup>1</sup>, Claudio Jommi<sup>1</sup>

<sup>1</sup> Centre for Research on Health and Social Care Management (CERGAS), SDA Bocconi School of Management, Bocconi University, Milan, Italy

Supplementary material

Results of the meta-analyses for different follow-up durations (m=months)

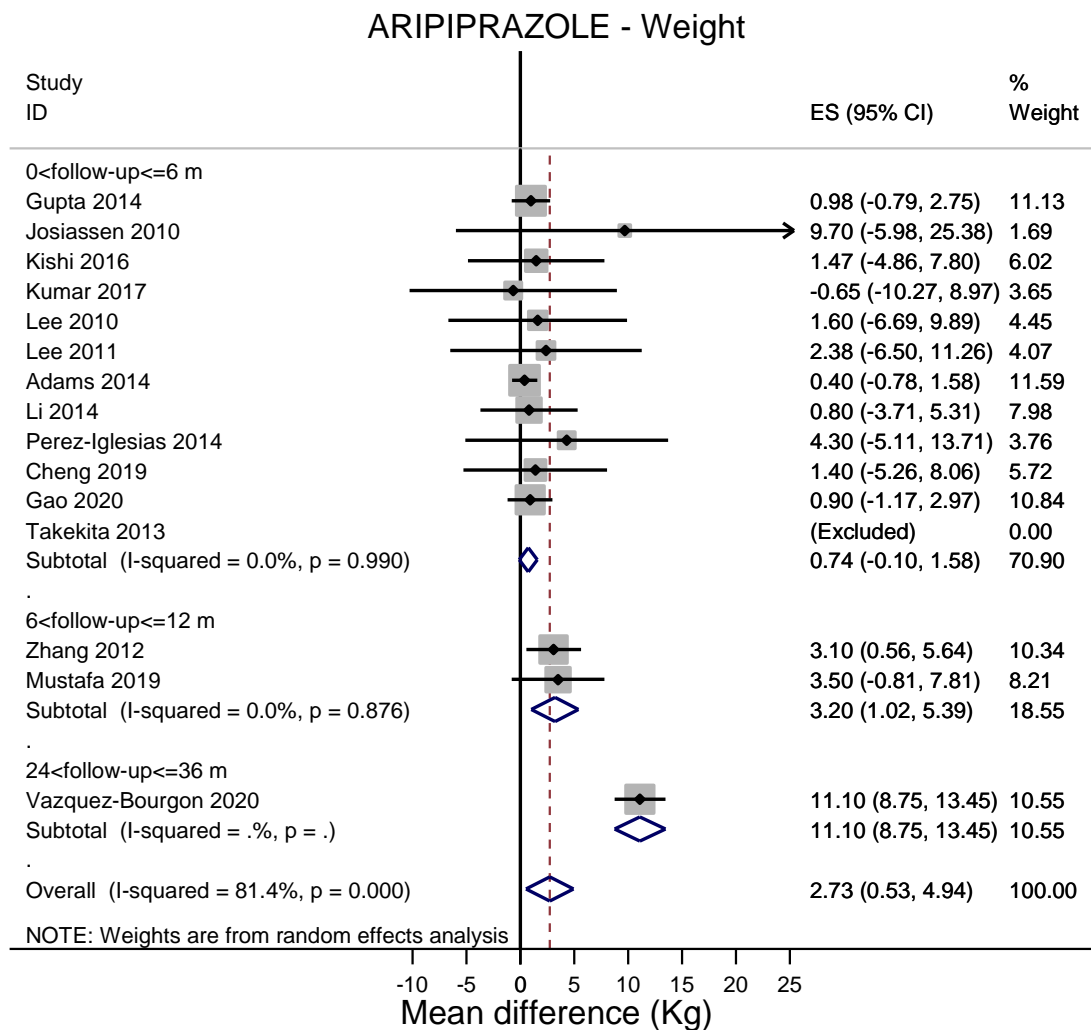

### ARIPIPIRAZOLE - BMI

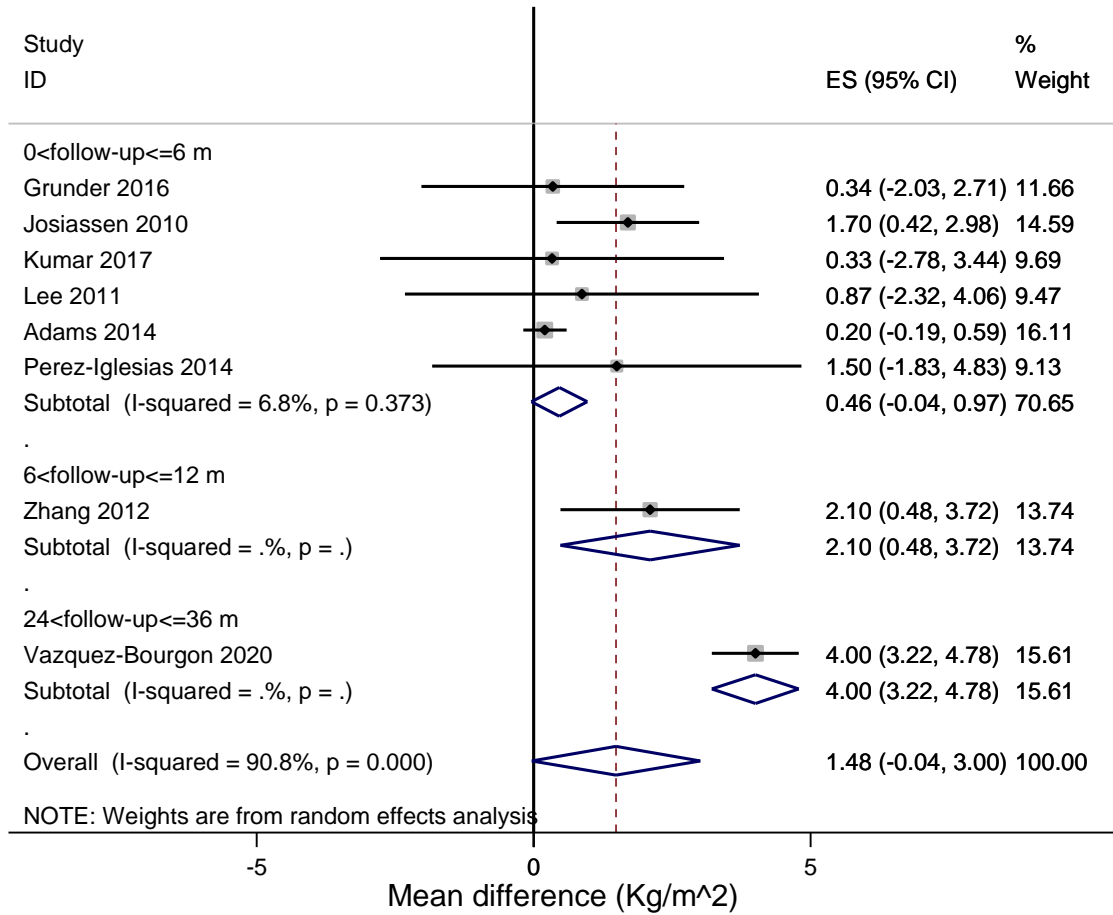

### ARIPIPRAZOLE - Total cholesterol

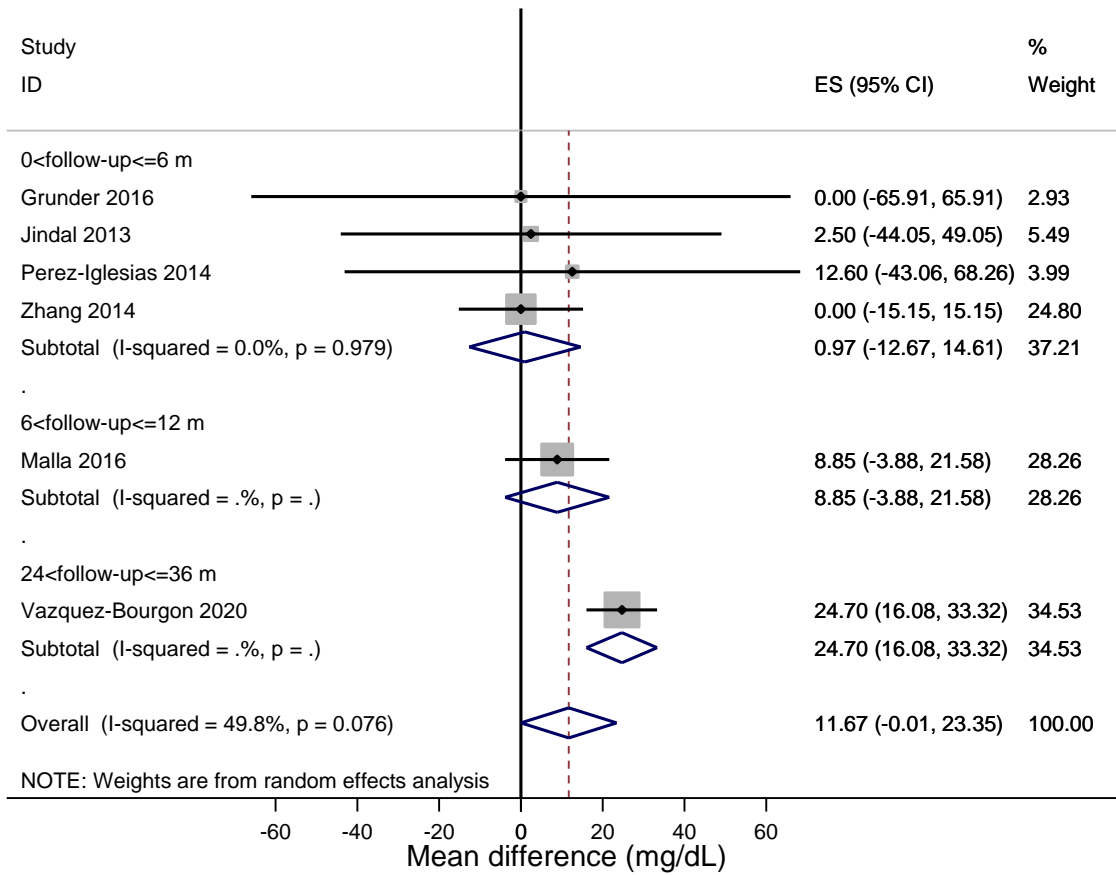

### ARIPIPRAZOLE - Cholesterol HDL

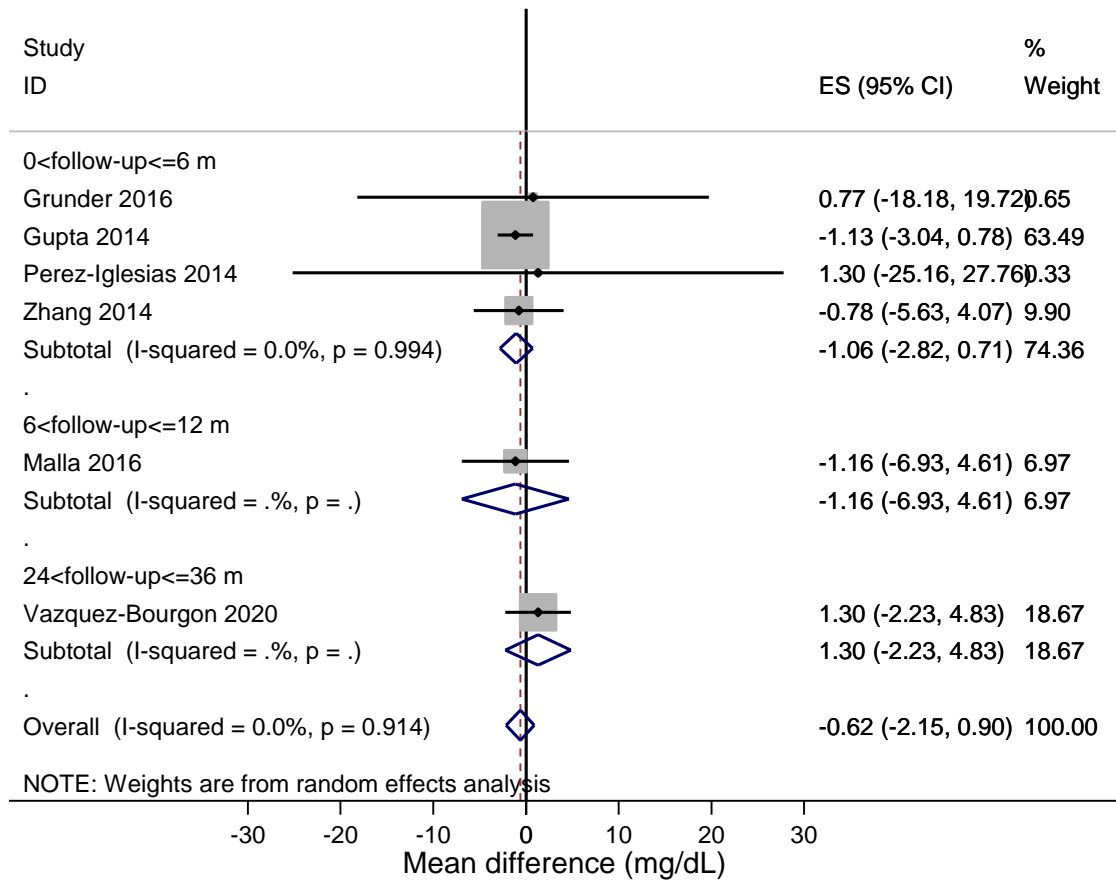

### ARIPRAZOLE - Triglycerides

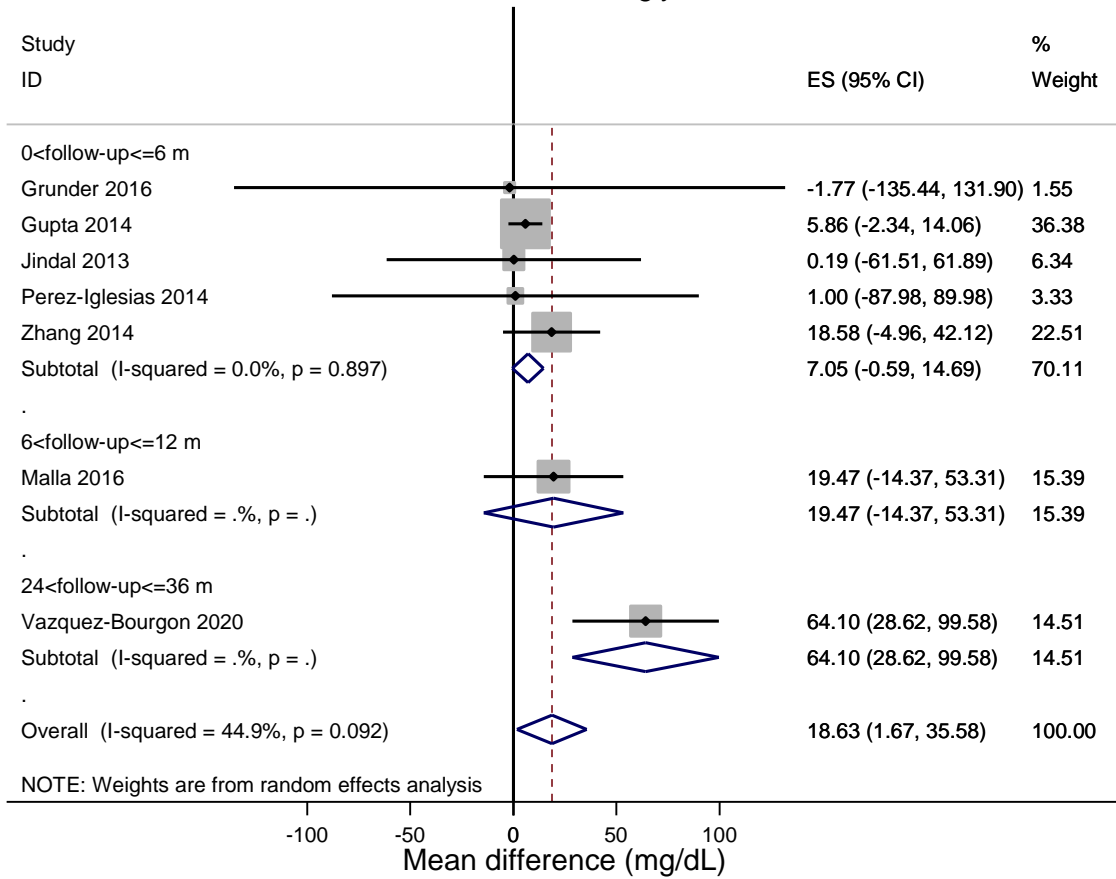

### ARIPIPRAZOLE - Fasting glucose

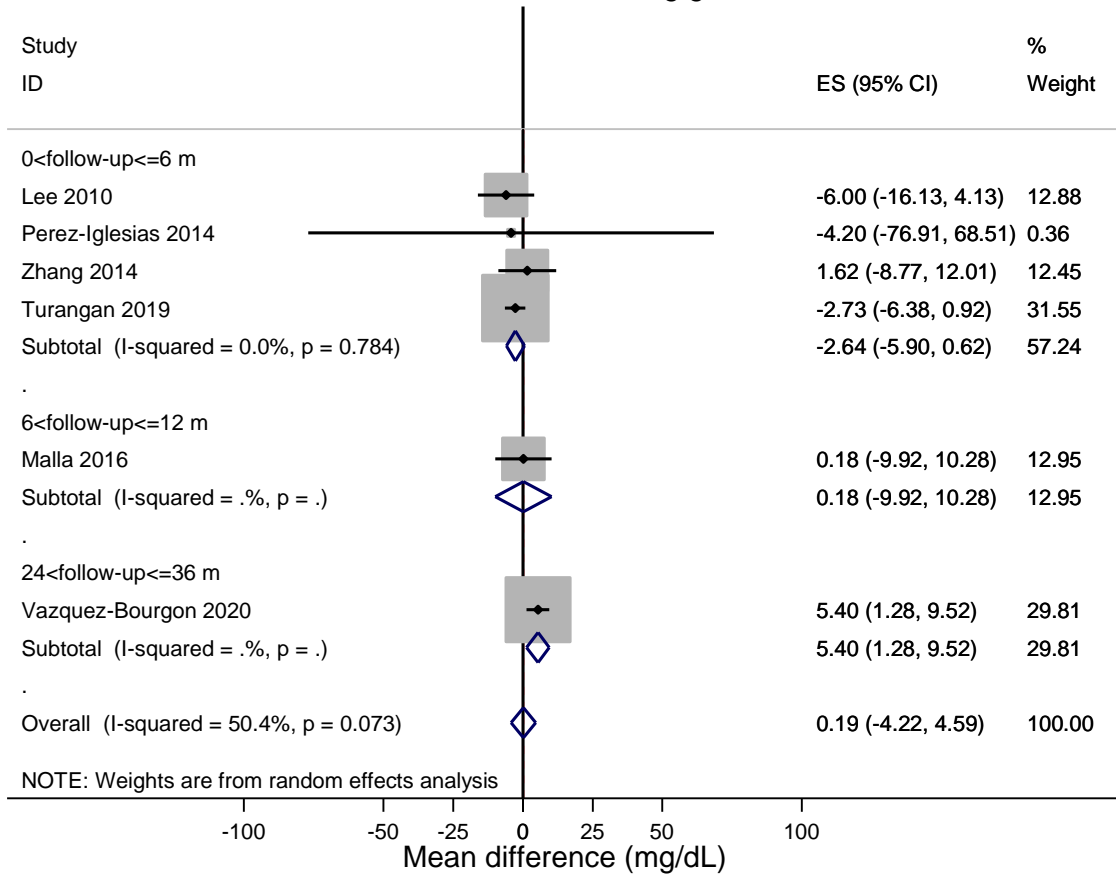

### ARIPIPRAZOLE - Systolic Blood Pressure

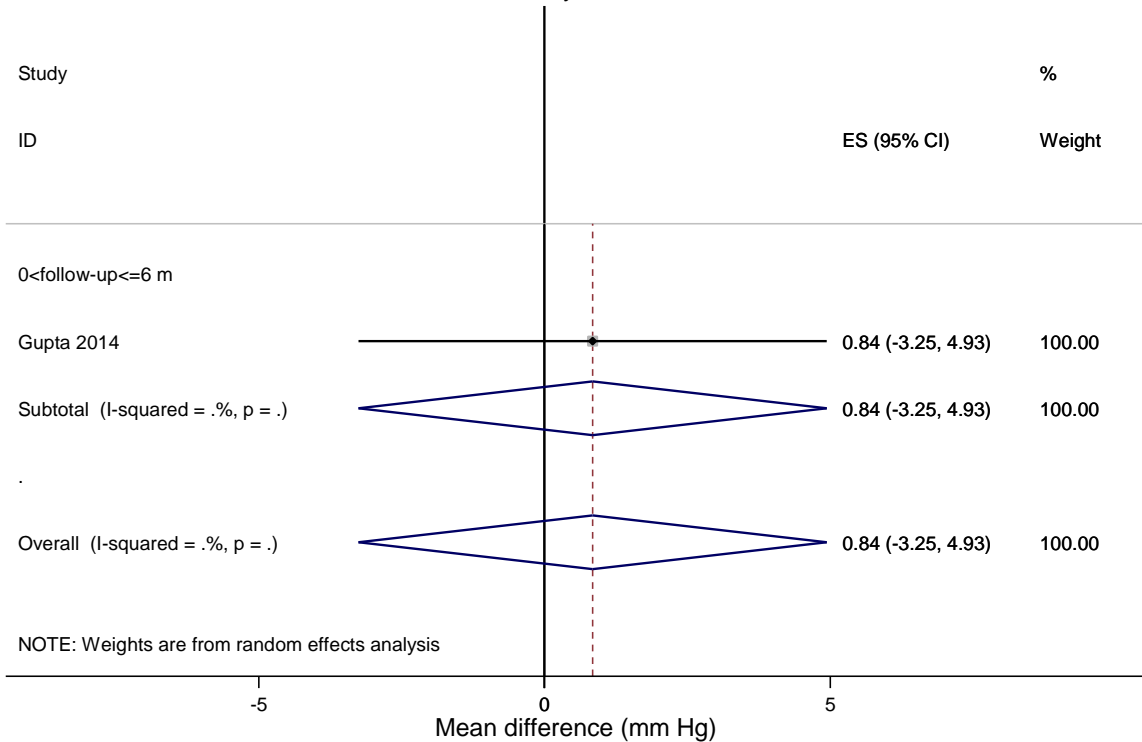

ARIPRAZOLE - Diastolic Blood Pressure

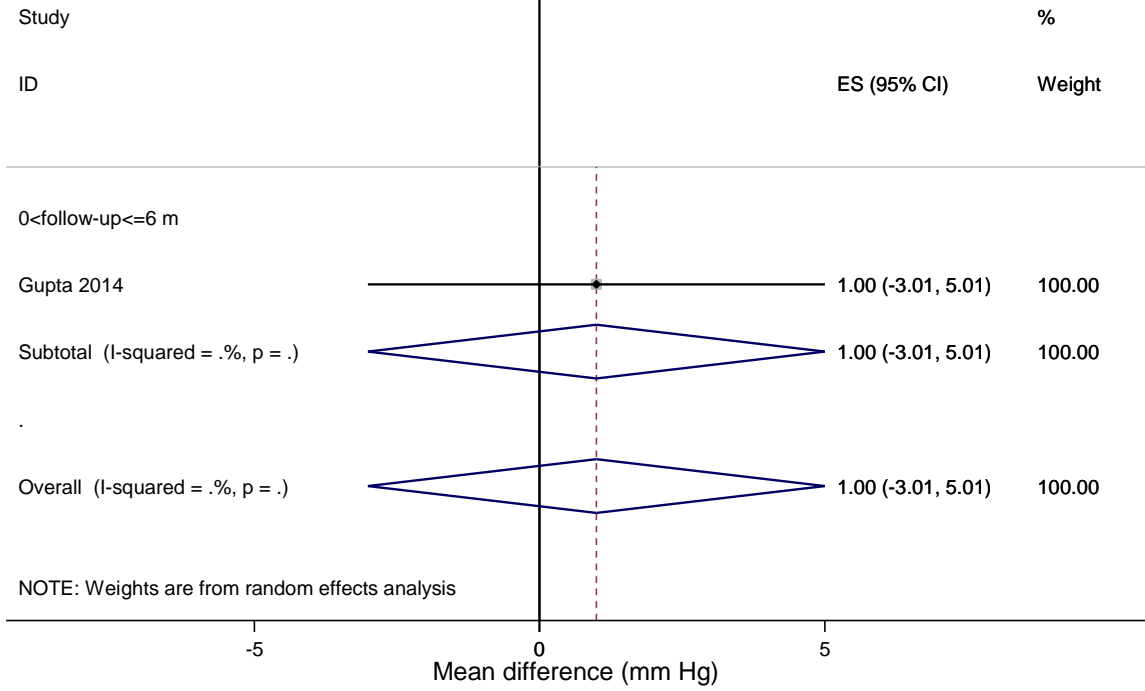



## LURASIDONE - Weight

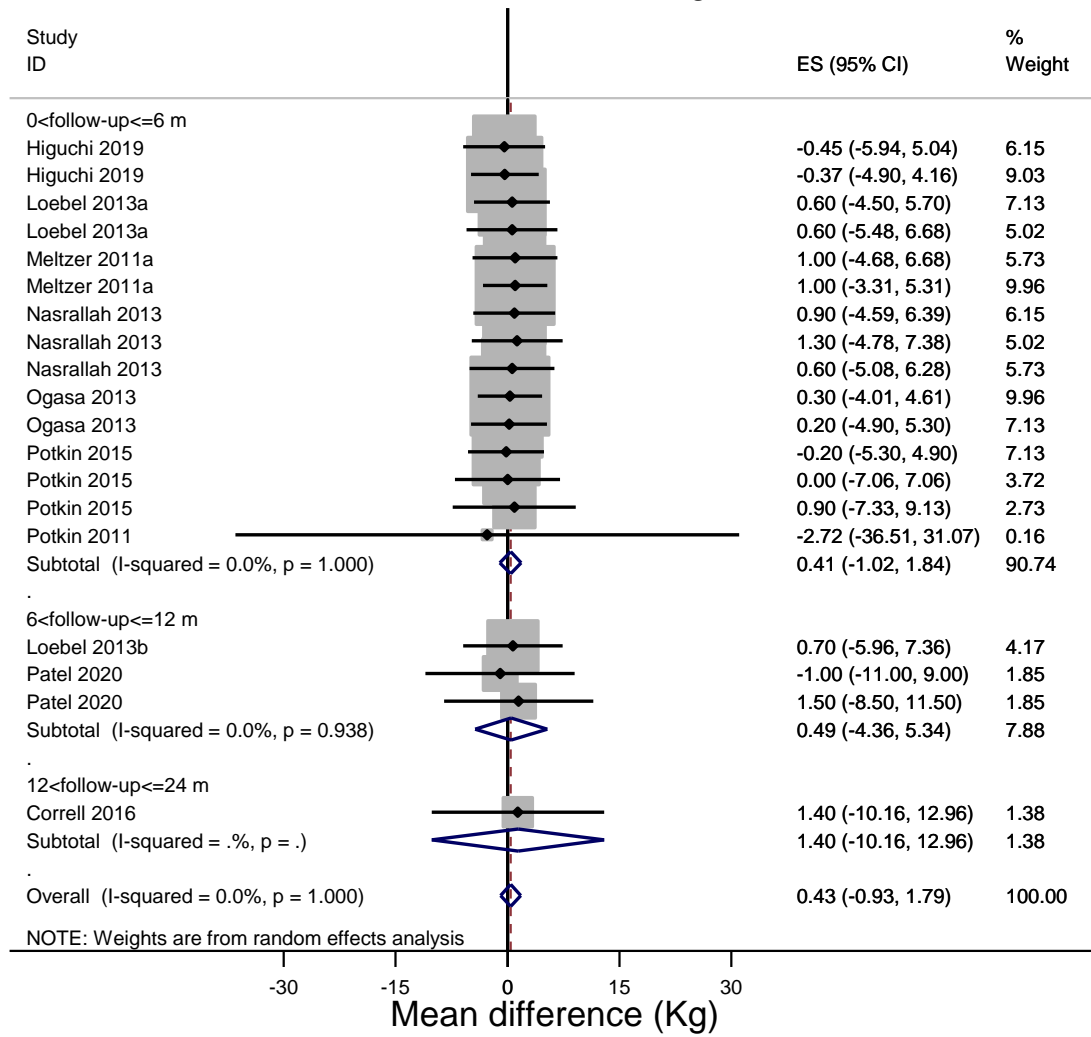

## LURASIDONE - BMI

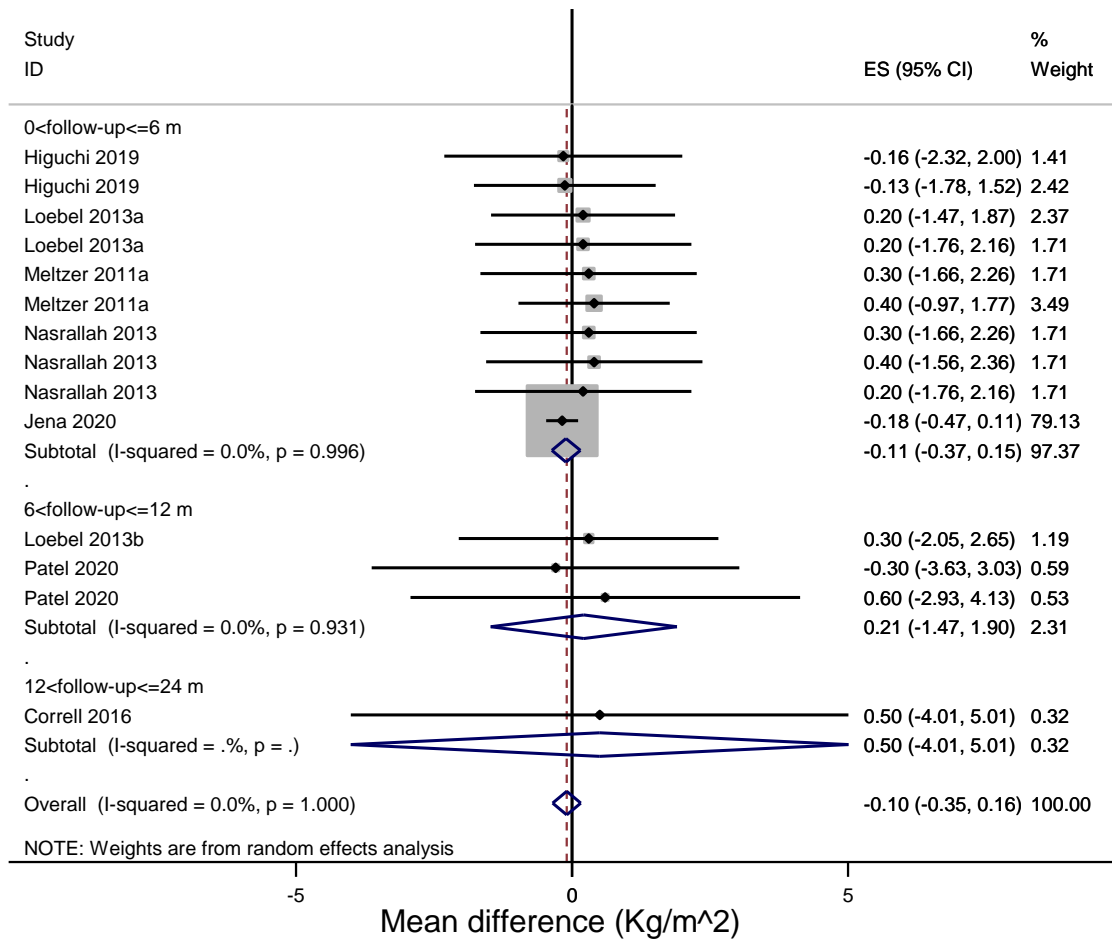

### LURASIDONE - Total cholesterol

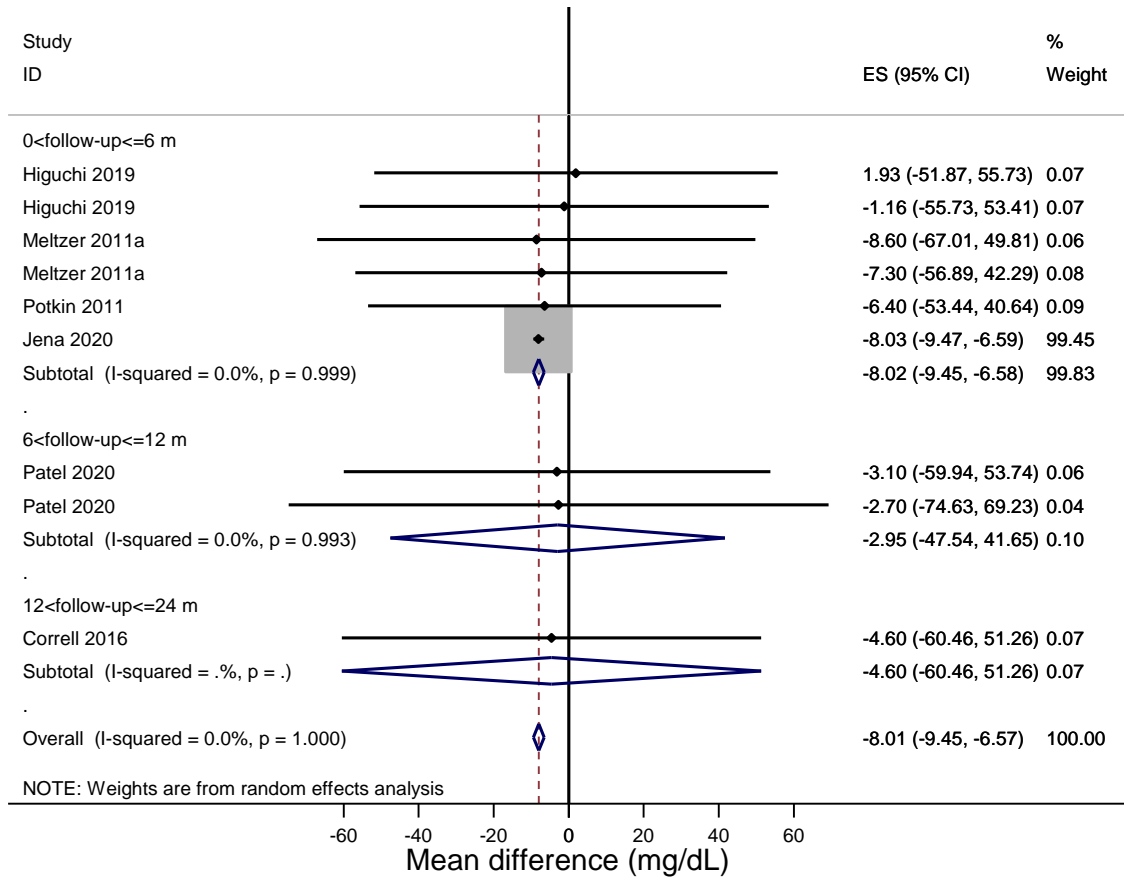

### LURASIDONE - Cholesterol HDL

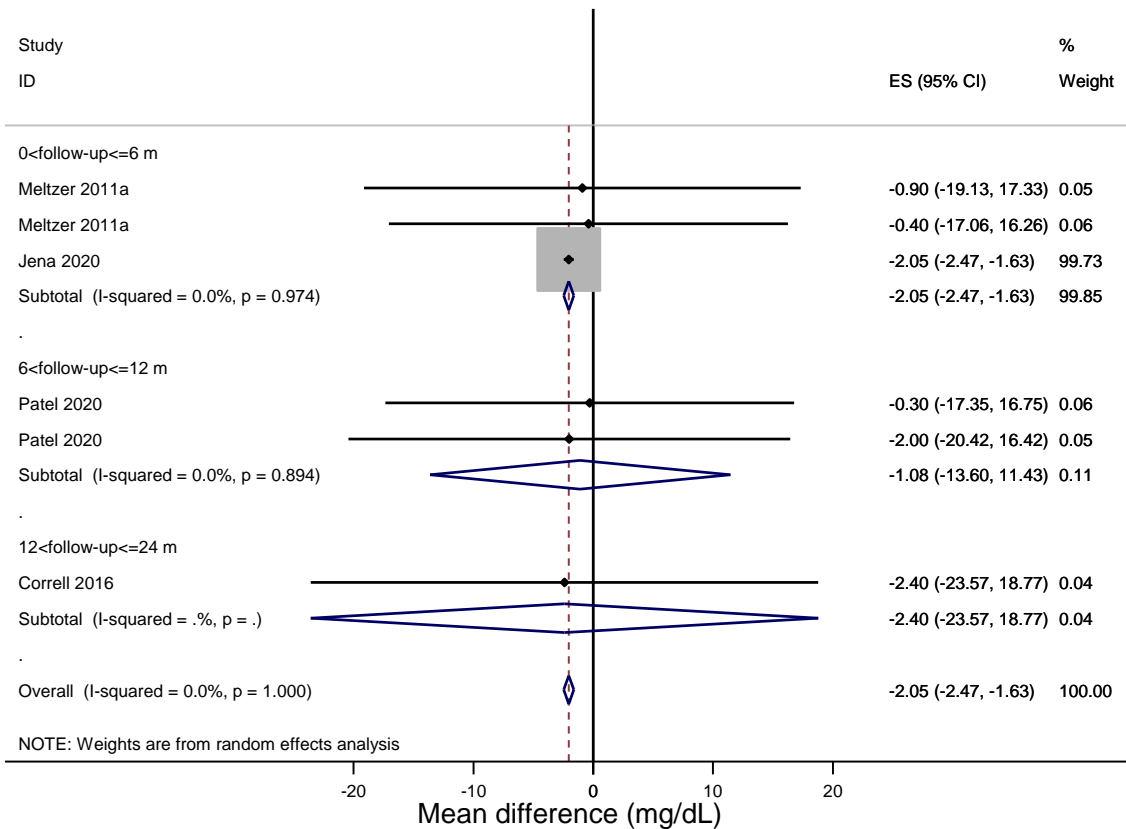

NOTE: Weights are from random effects analysis

### LURASIDONE - Triglycerides

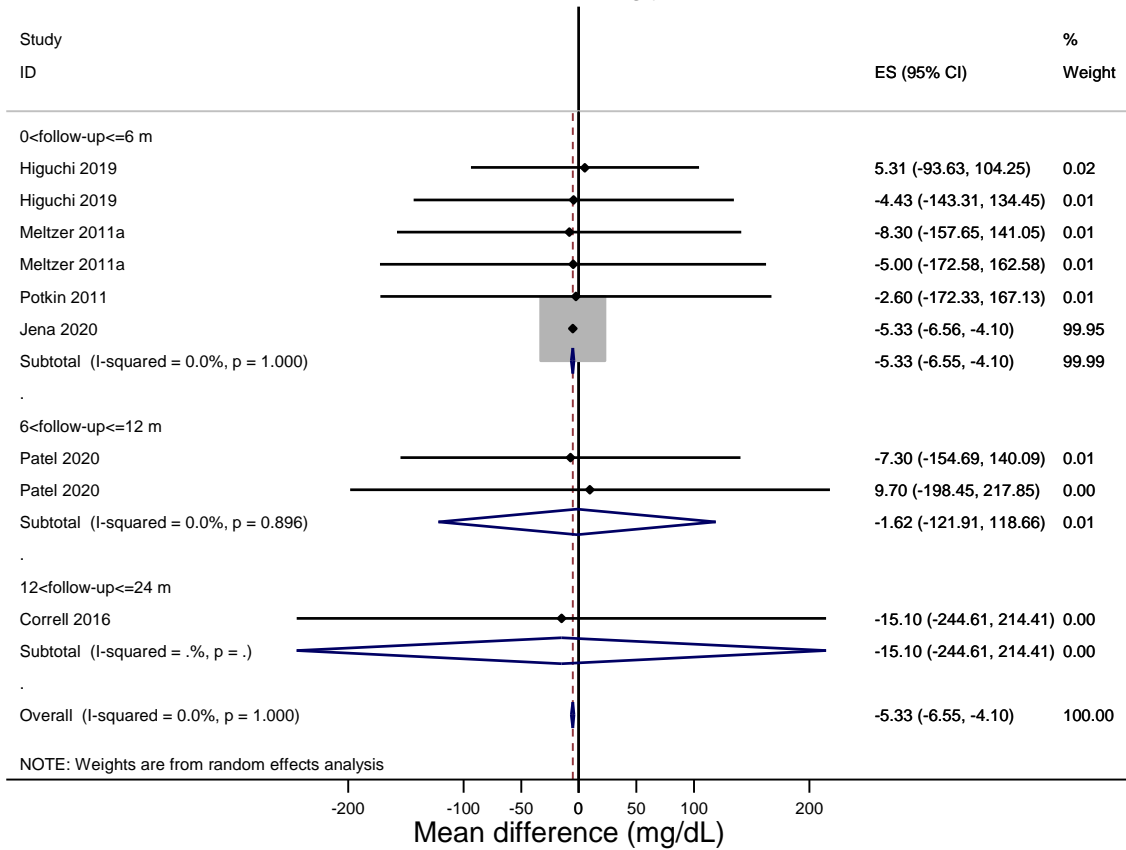

### LURASIDONE - Fasting glucose

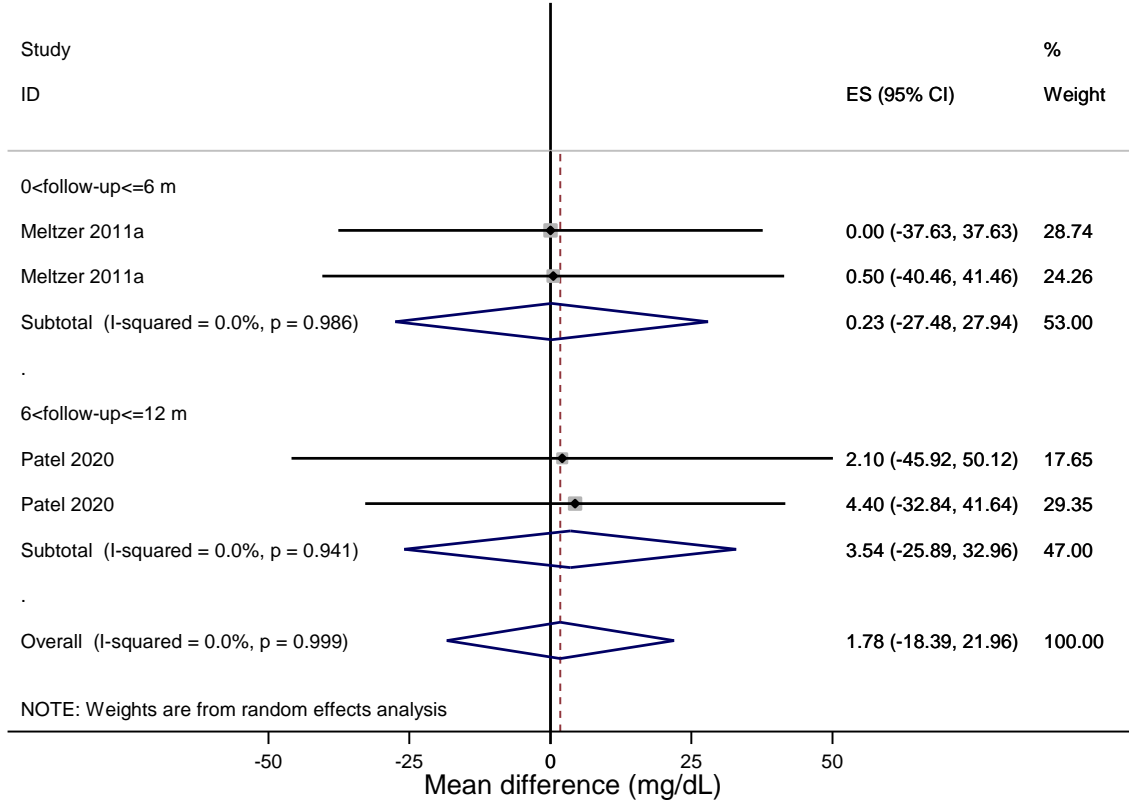

### LURASIDONE - Systolic Blood Pressure

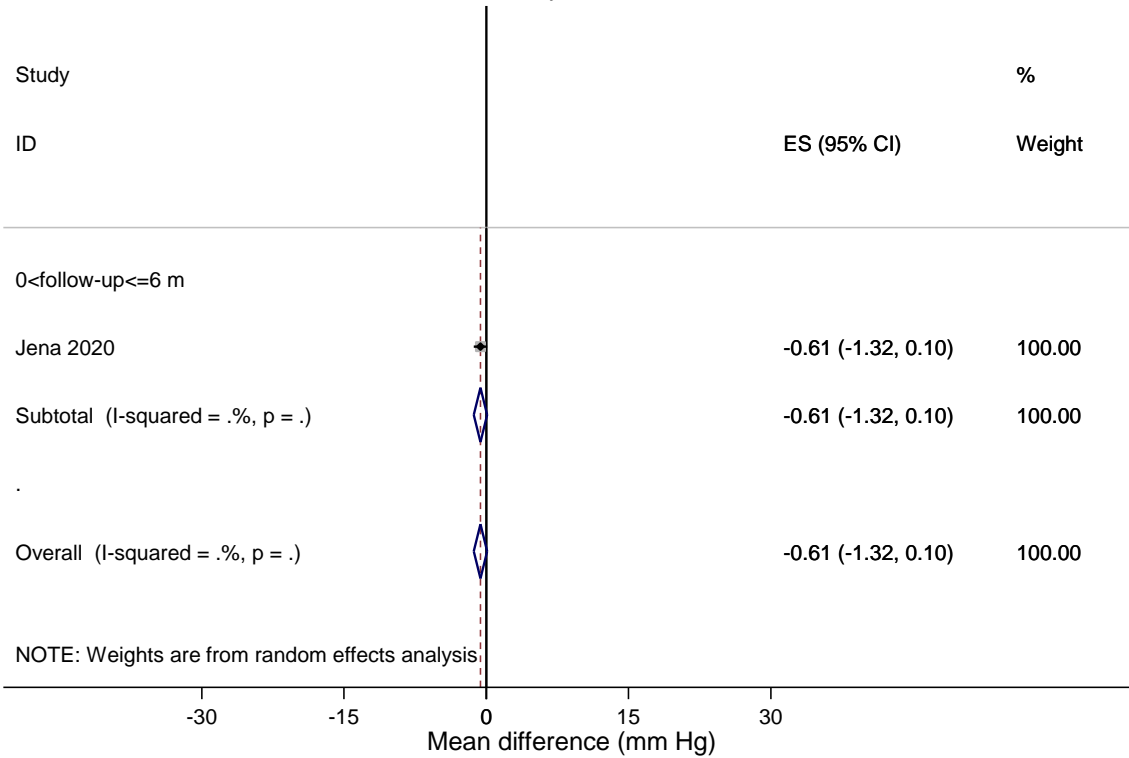

LURASIDONE - Diastolic Blood Pressure

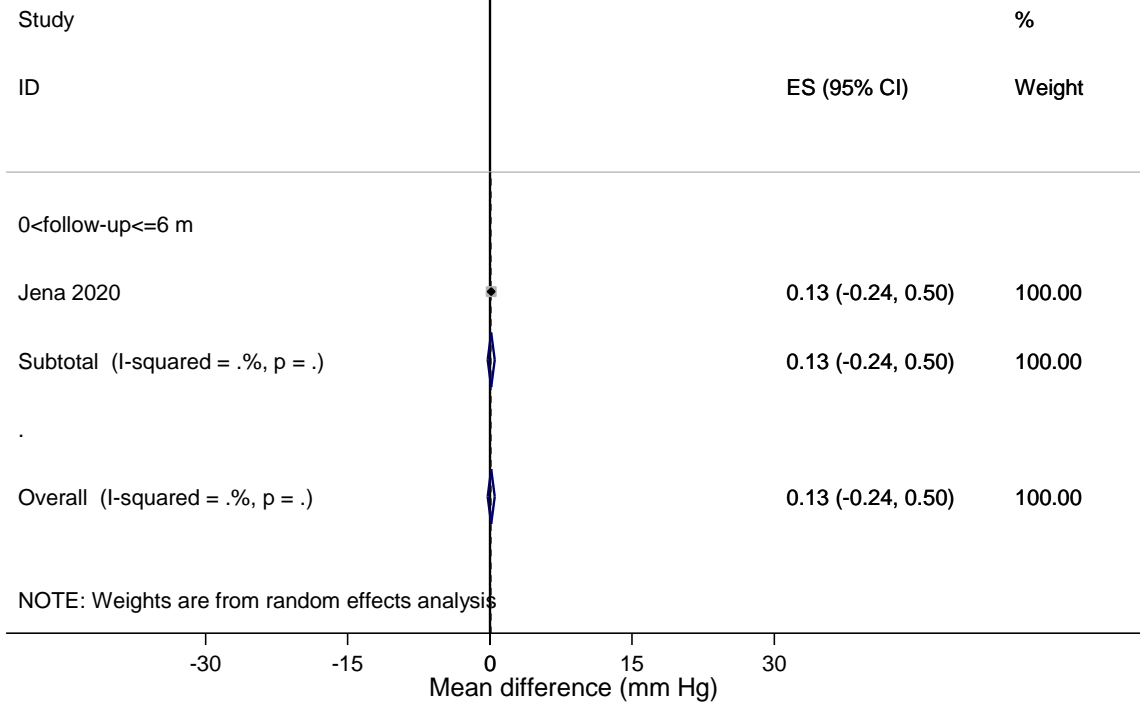

# OLANZAPINE - Weight

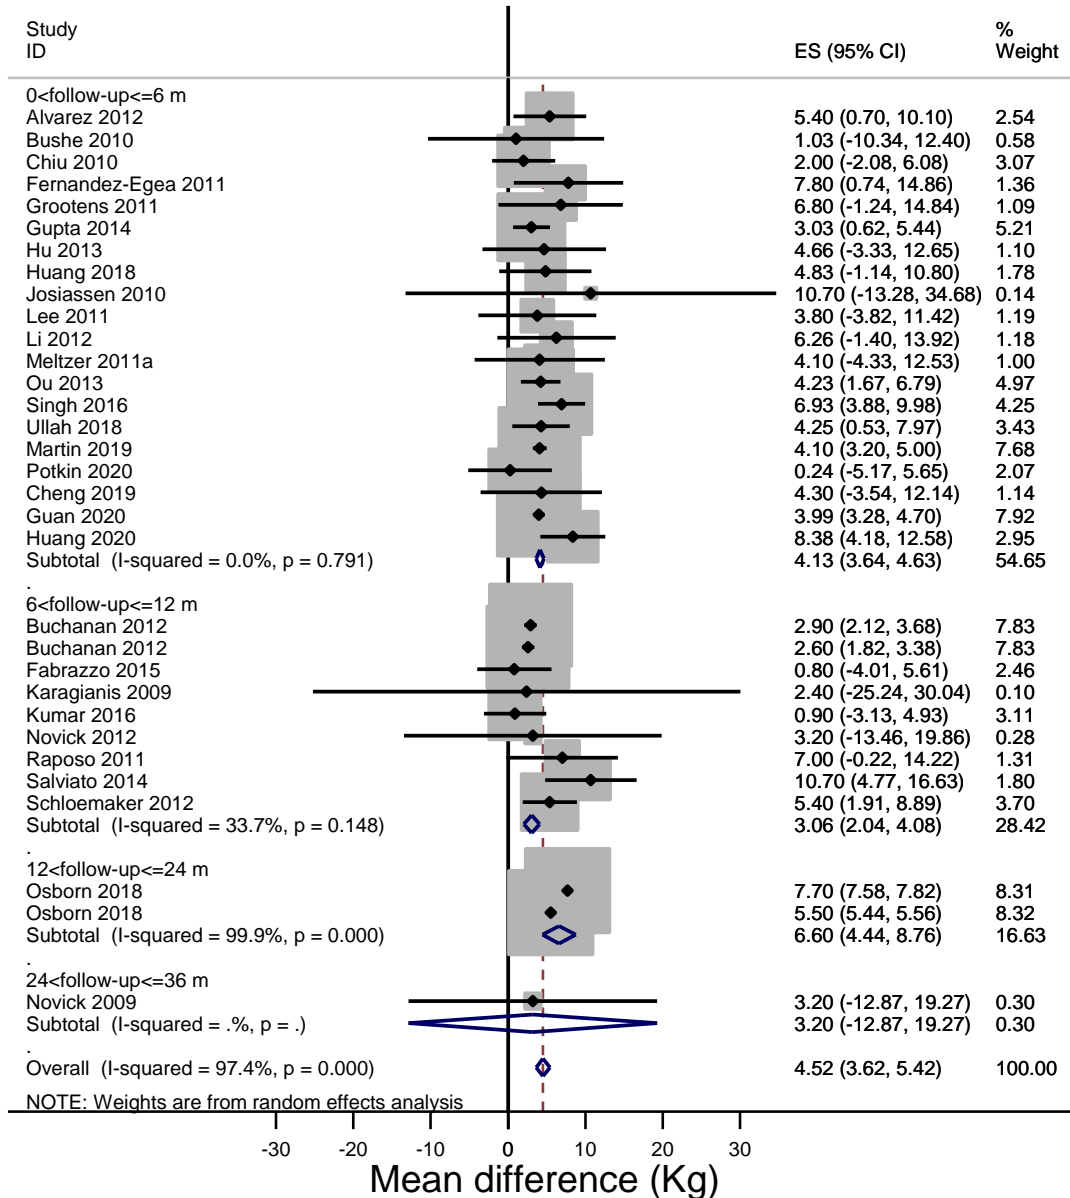



# OLANZAPINE - BMI

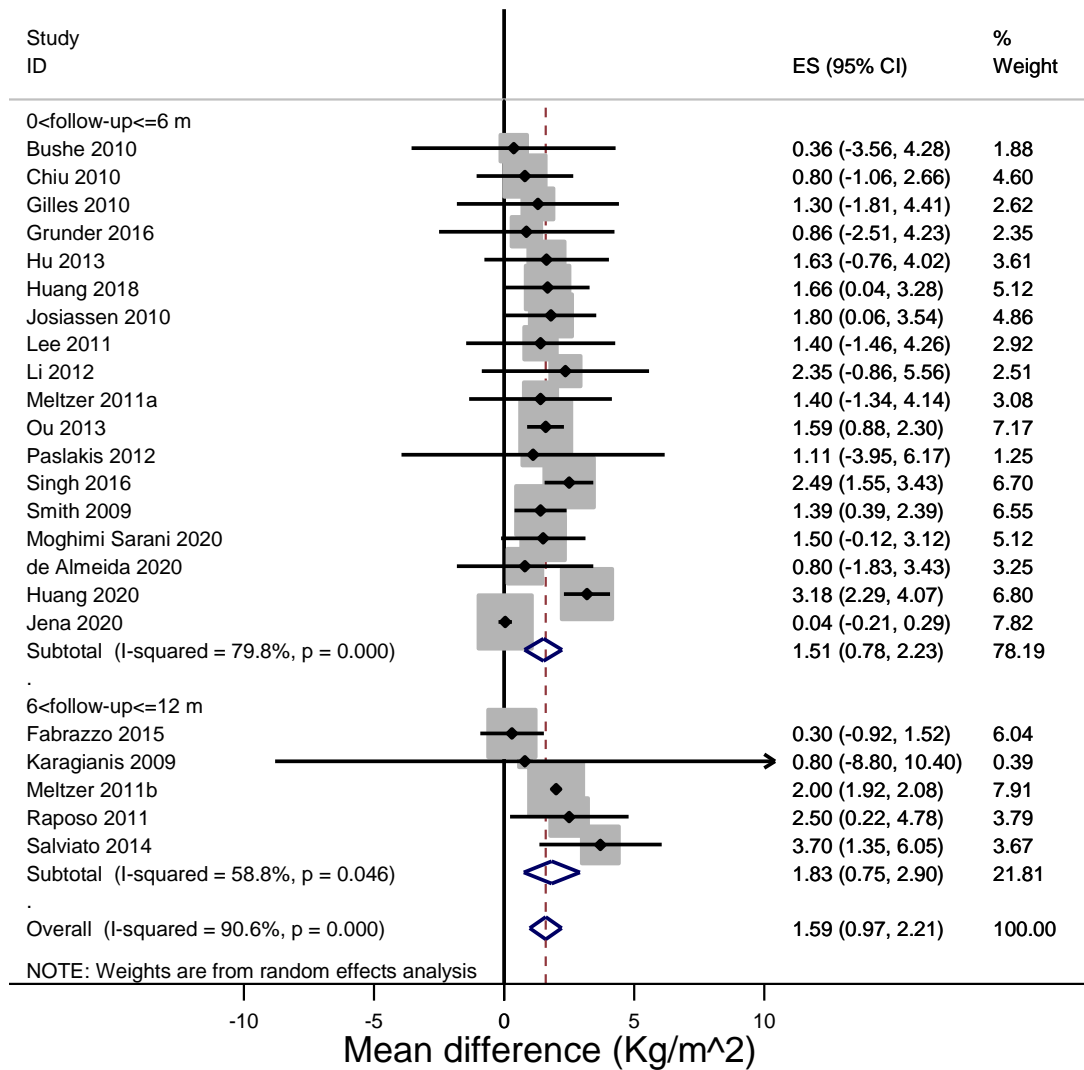

# OLANZAPINE - Total cholesterol

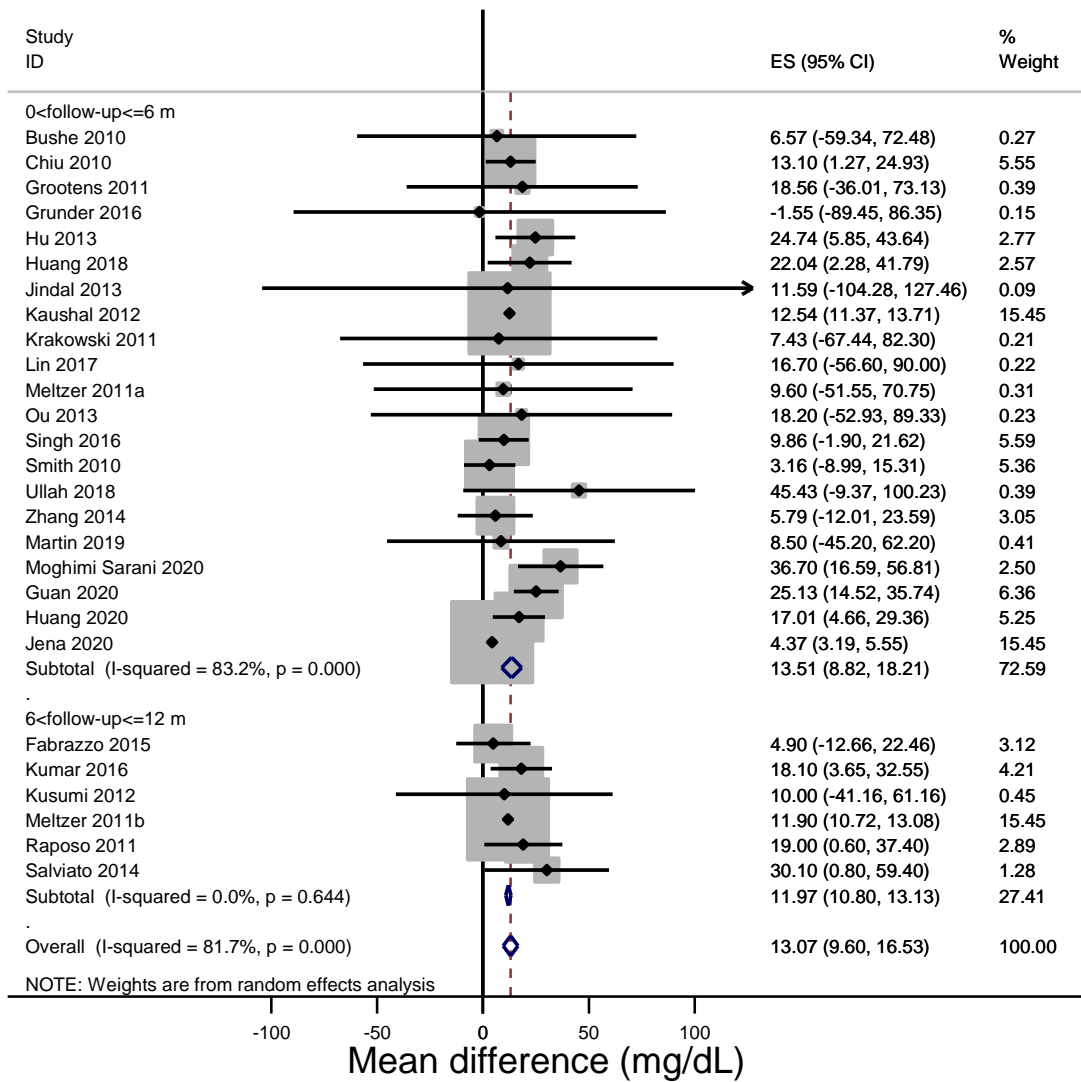

# OLANZAPINE - Cholesterol HDL

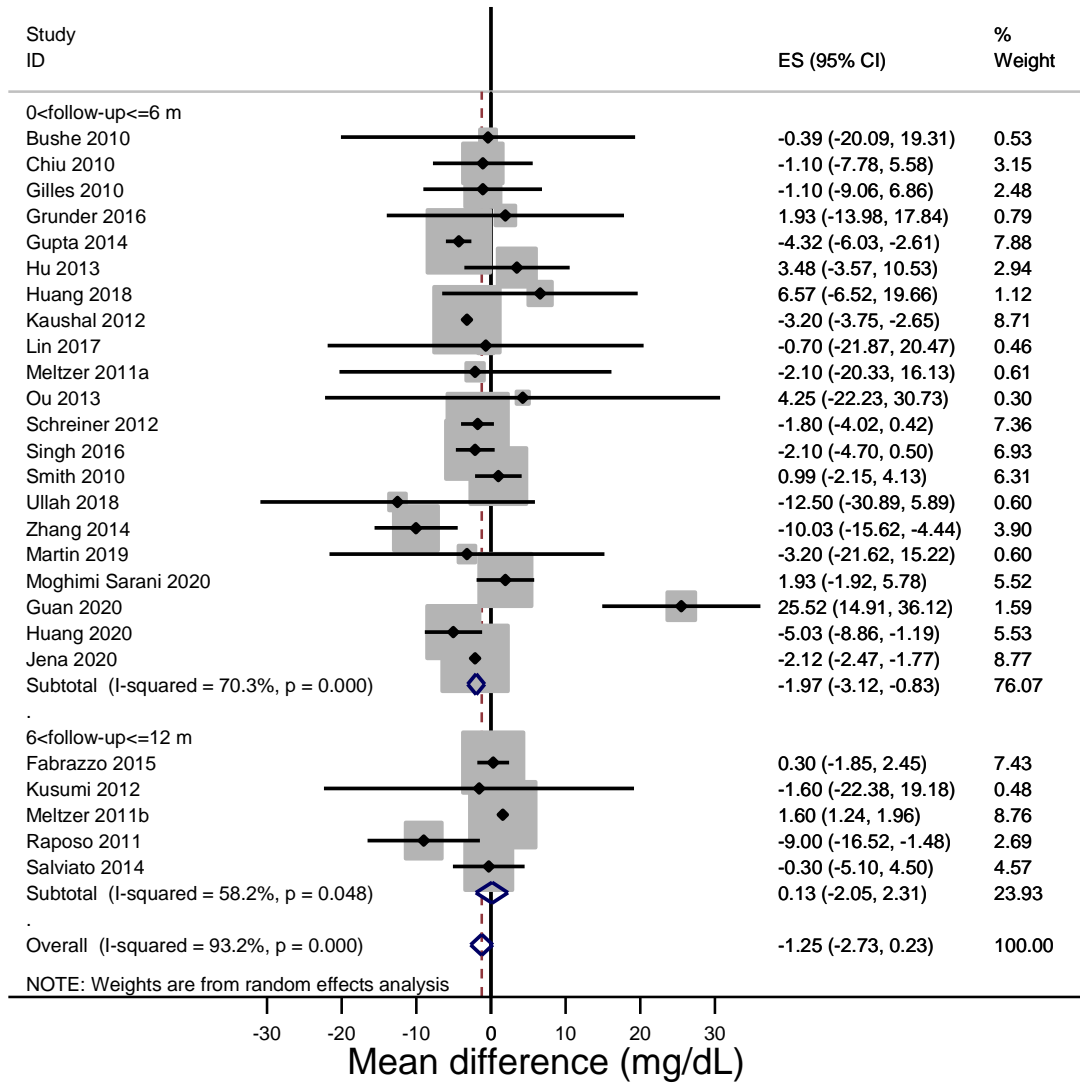

# OLANZAPINE - Triglycerides

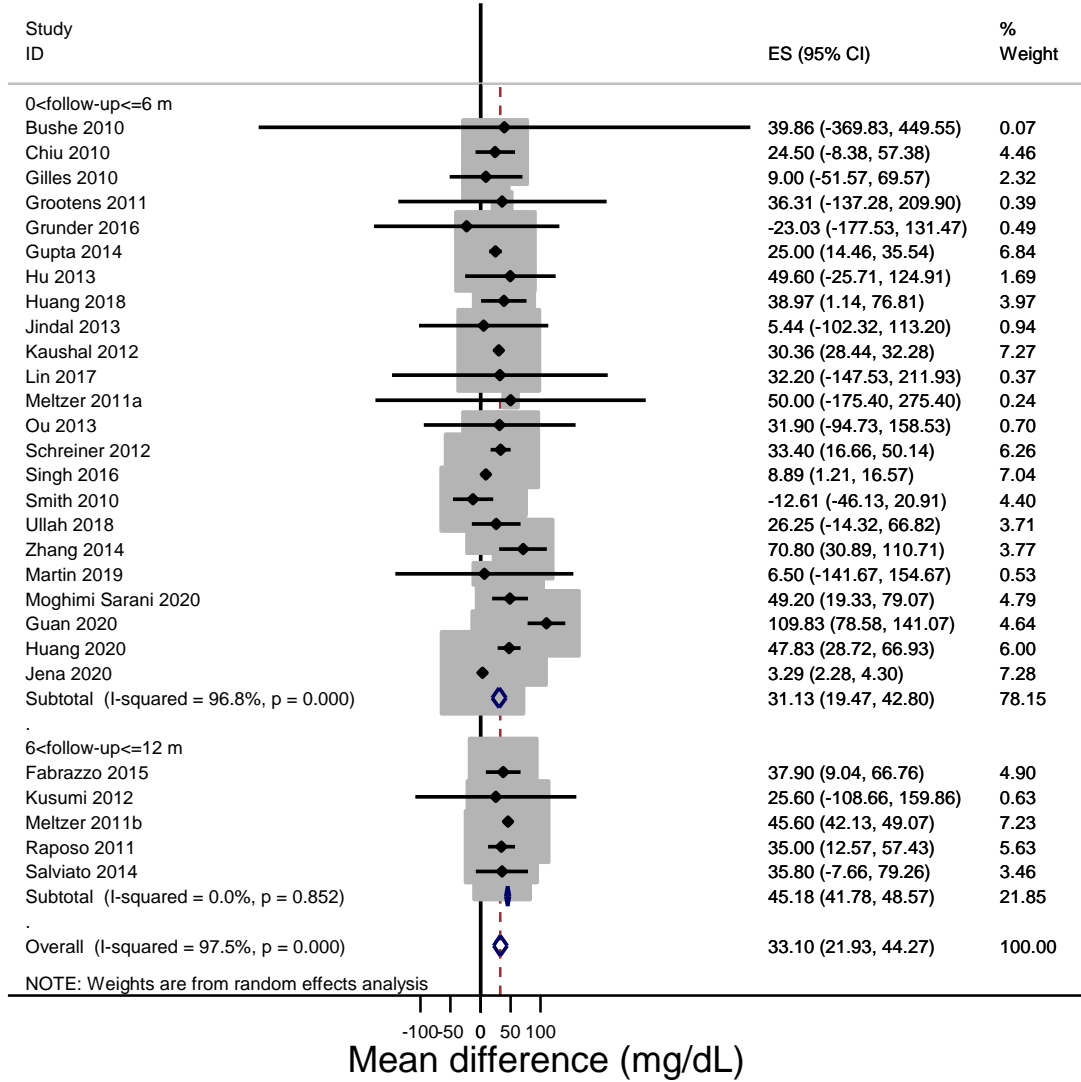

# OLANZAPINE - Fasting glucose

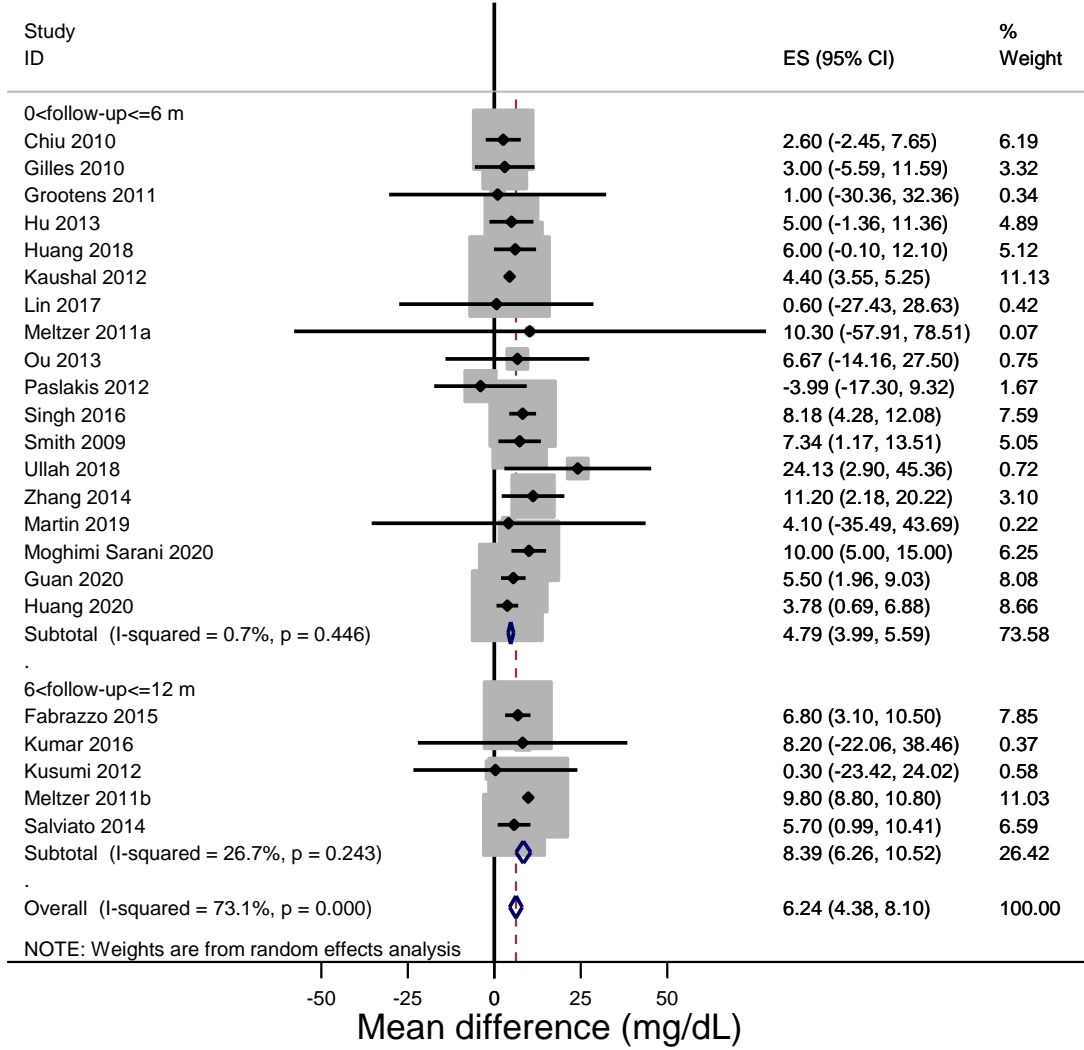

### OLANZAPINE - Systolic Blood Pressure

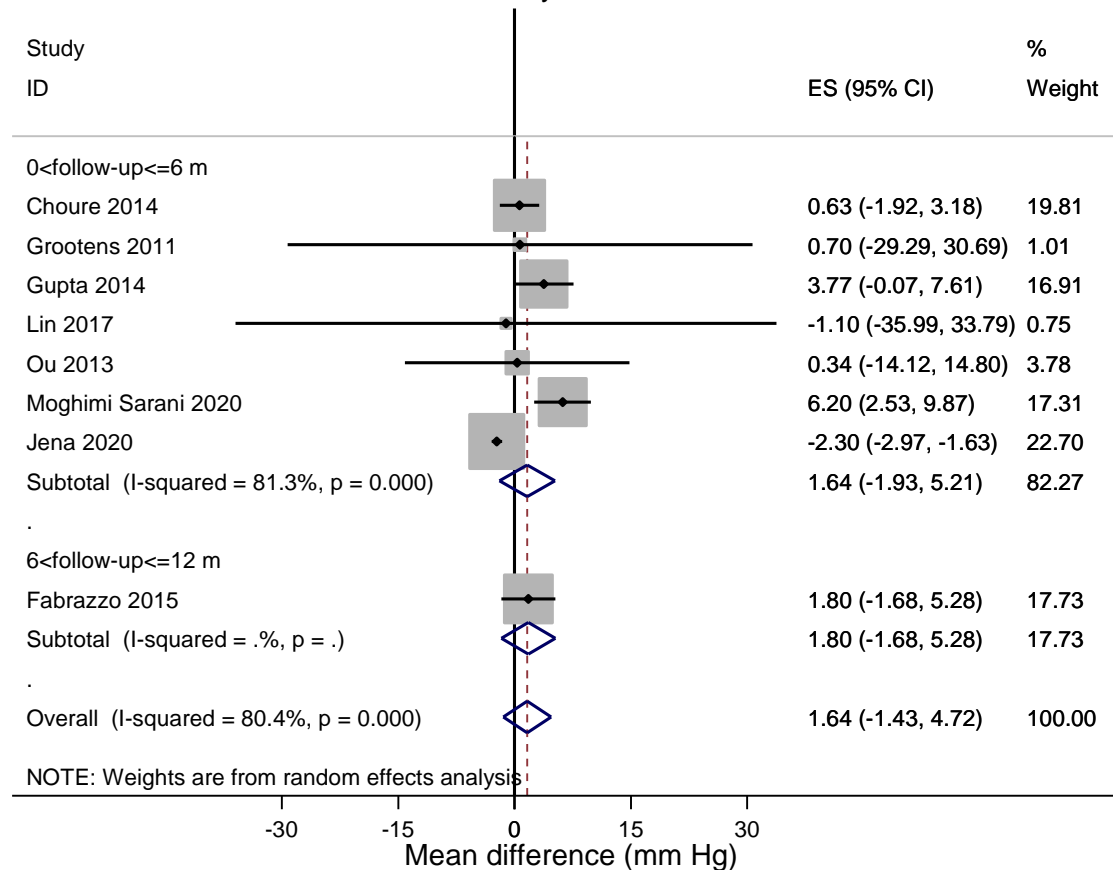

### OLANZAPINE - Diastolic Blood Pressure

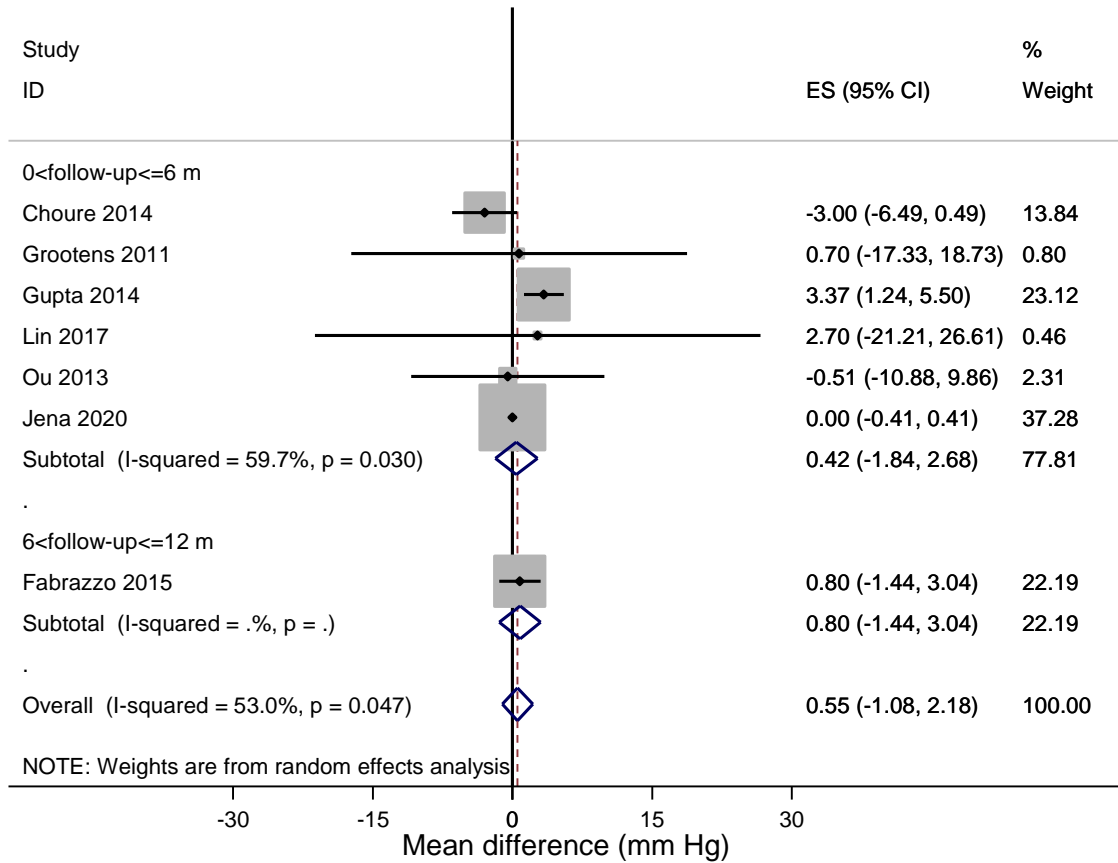

### PALIPERIDONE XR - Weight

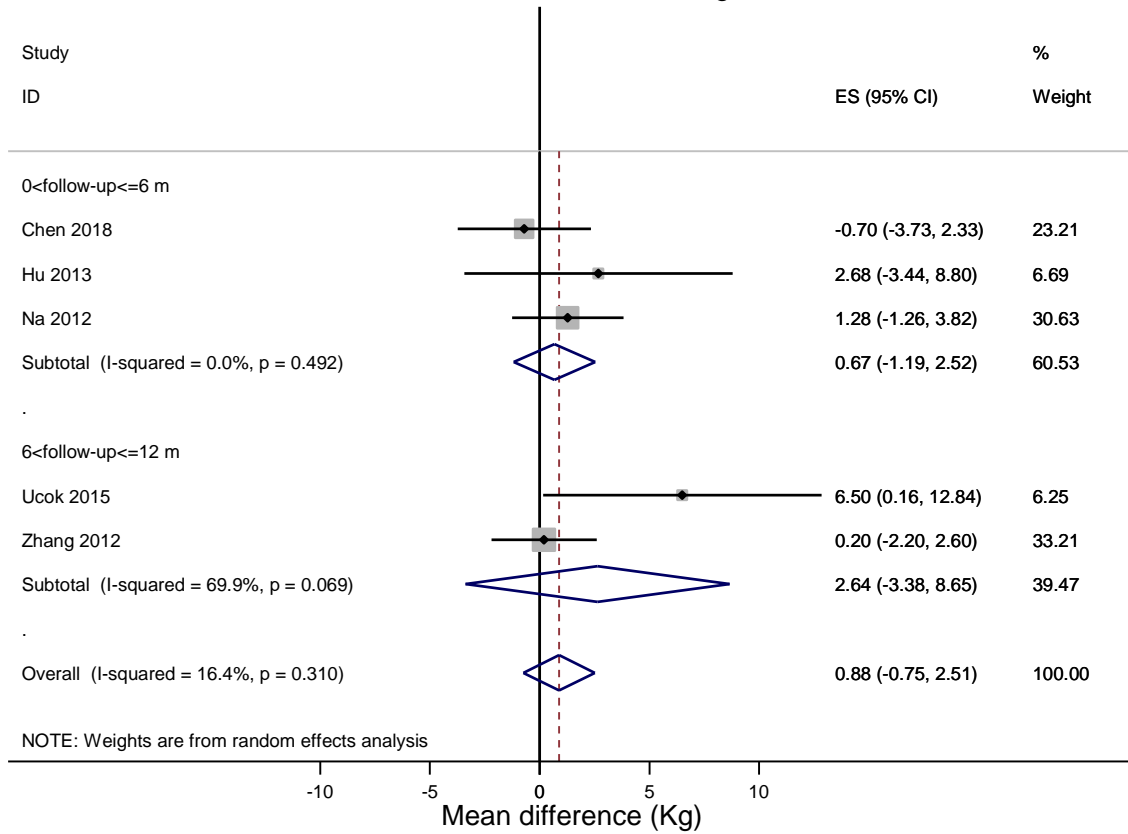



### PALIPERIDONE XR - BMI

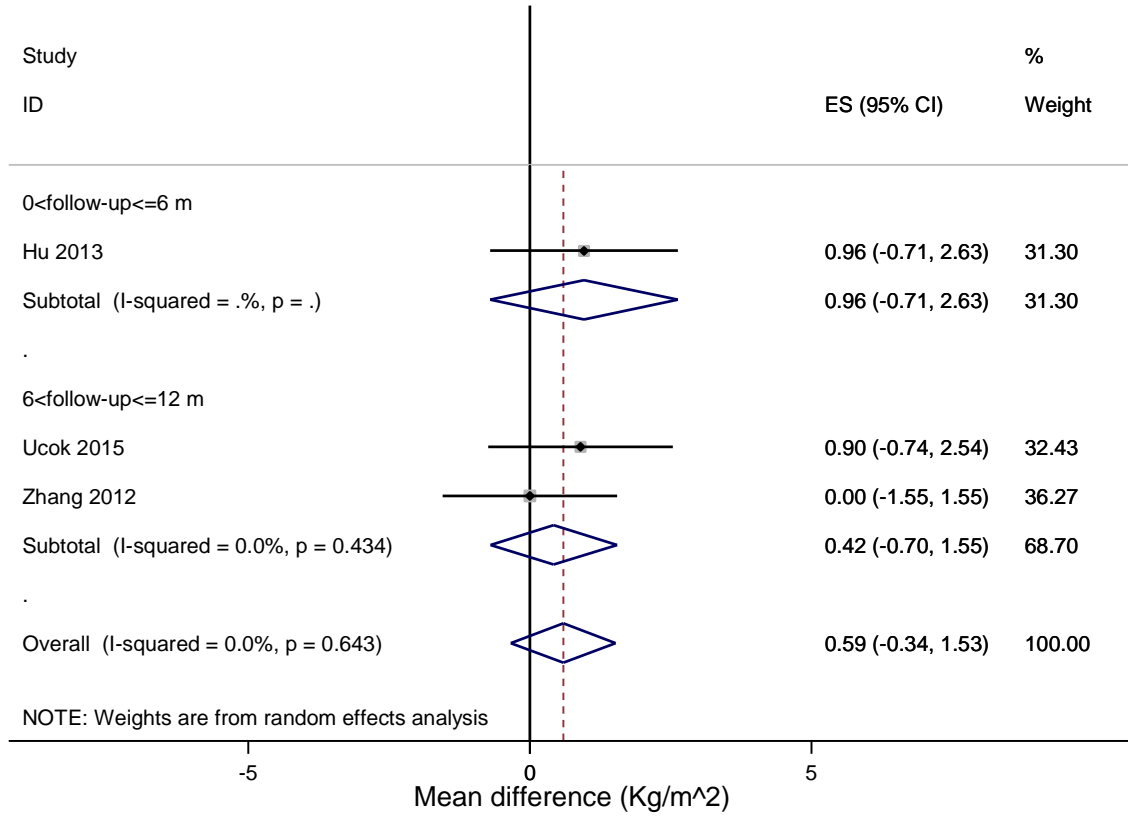

### PALIPERIDONE XR - Total cholesterol

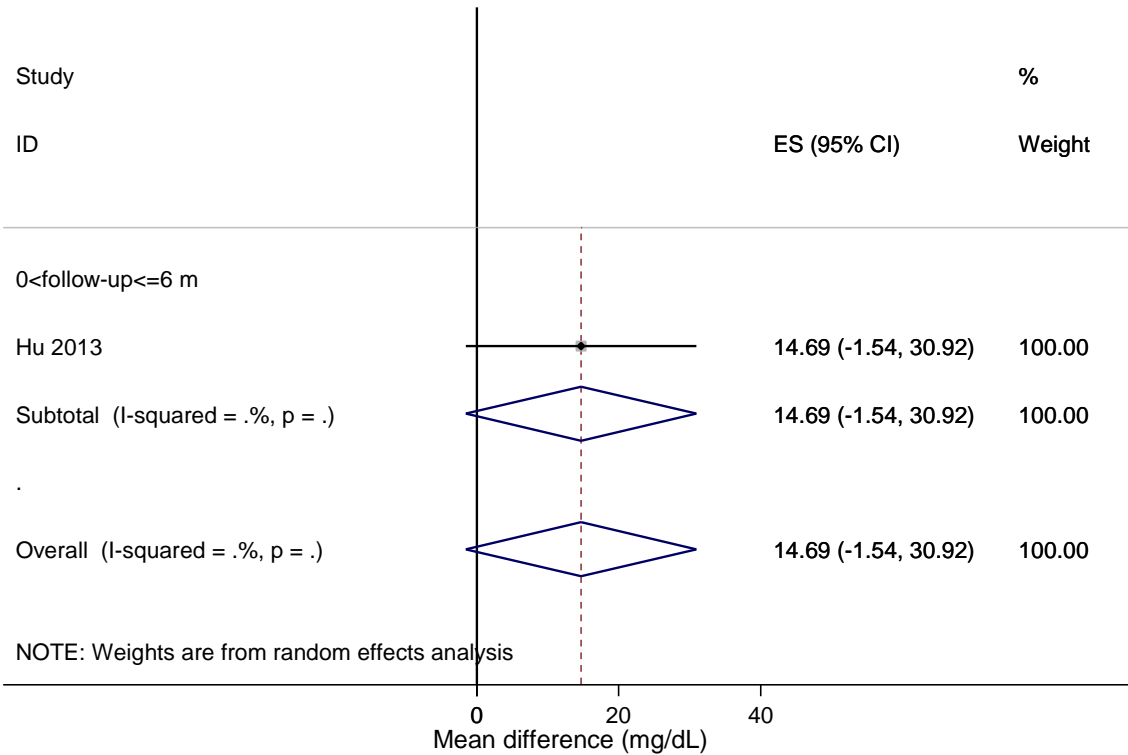

PALIPERIDONE XR - Cholesterol HDL

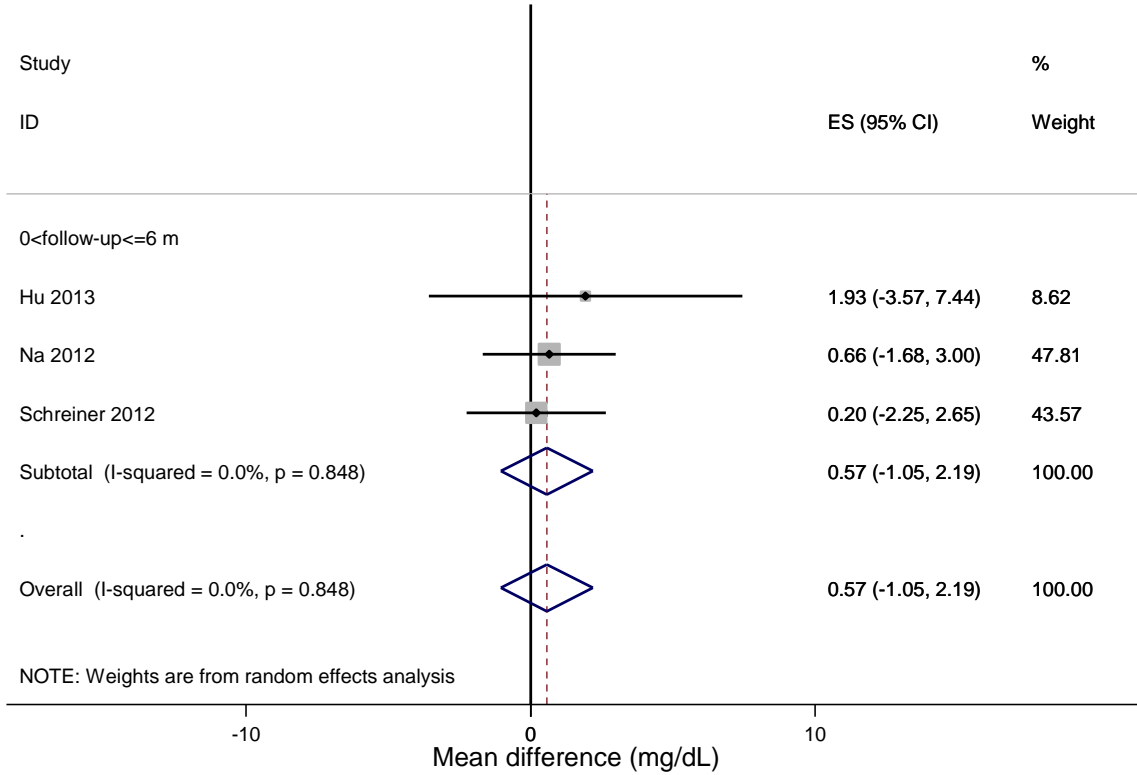

PALIPERIDONE XR - Triglycerides

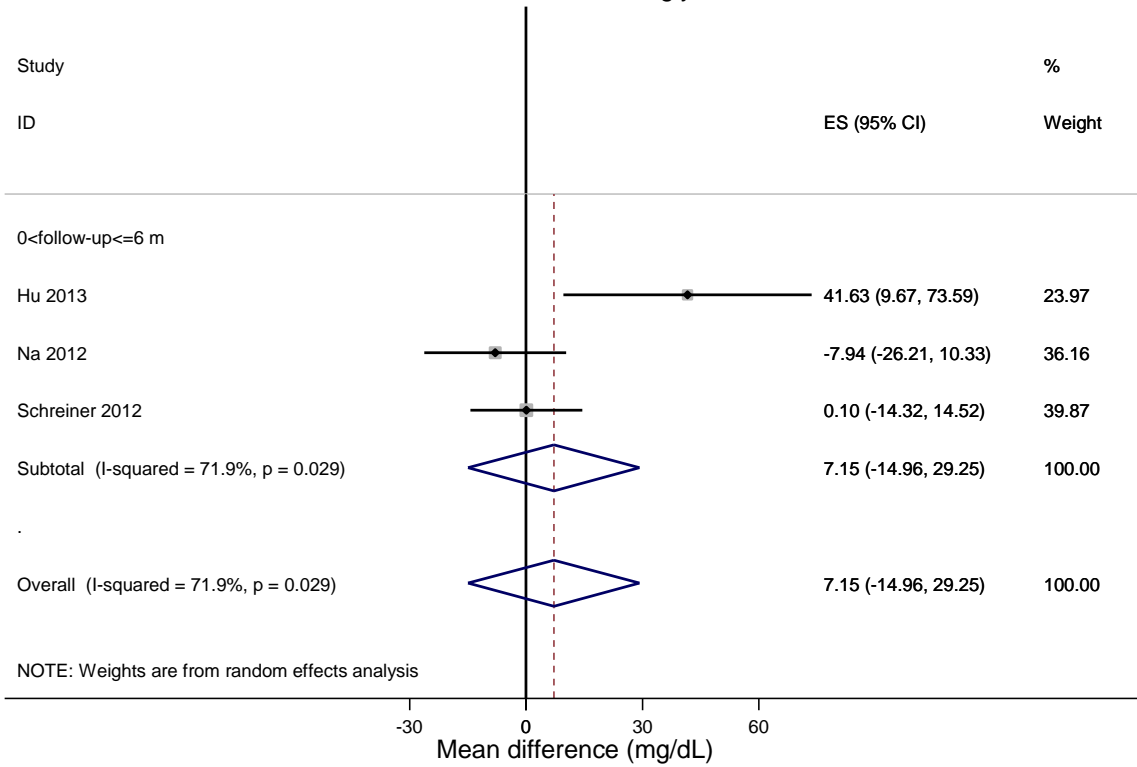

PALIPERIDONE XR - Fasting glucose

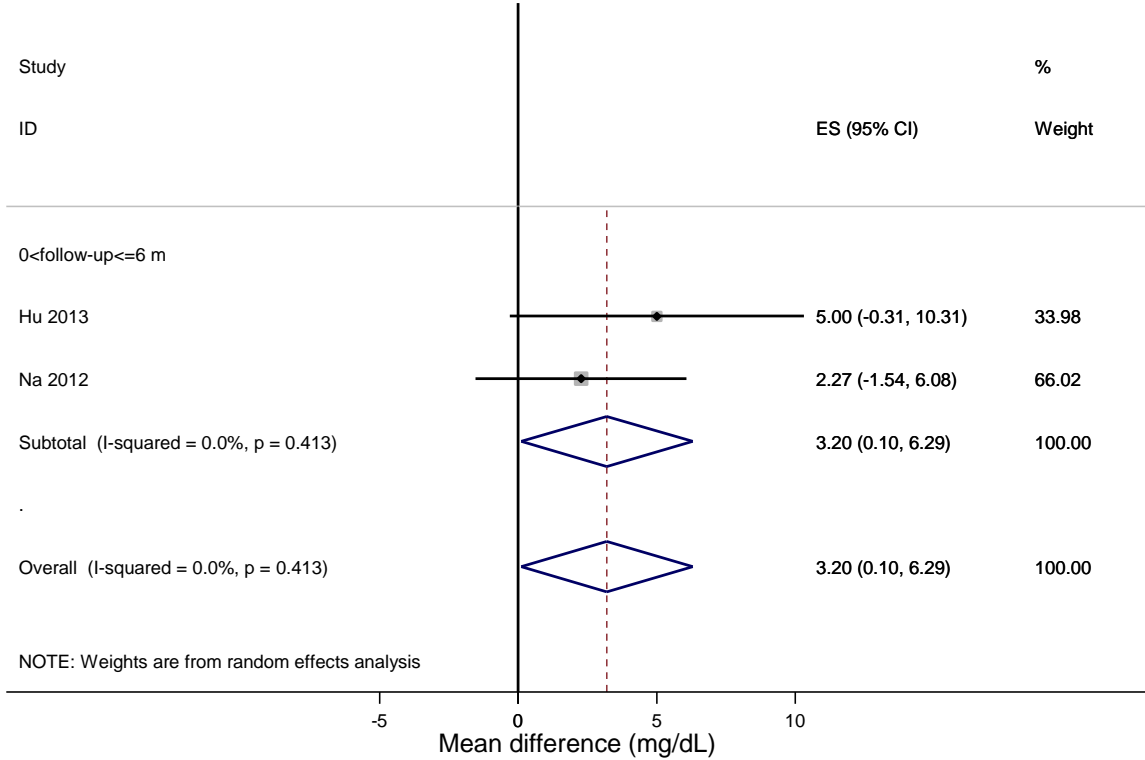

PALIPERIDONE XR - Systolic Blood Pressure

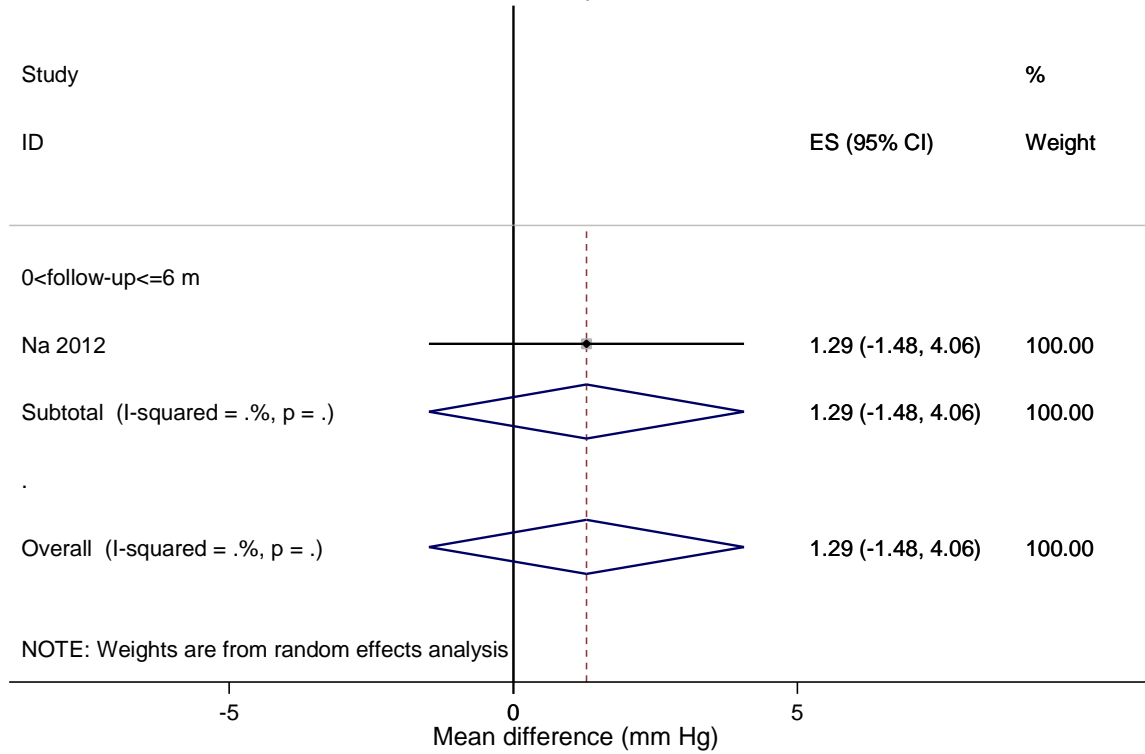

### QUETIAPINE XR - Weight

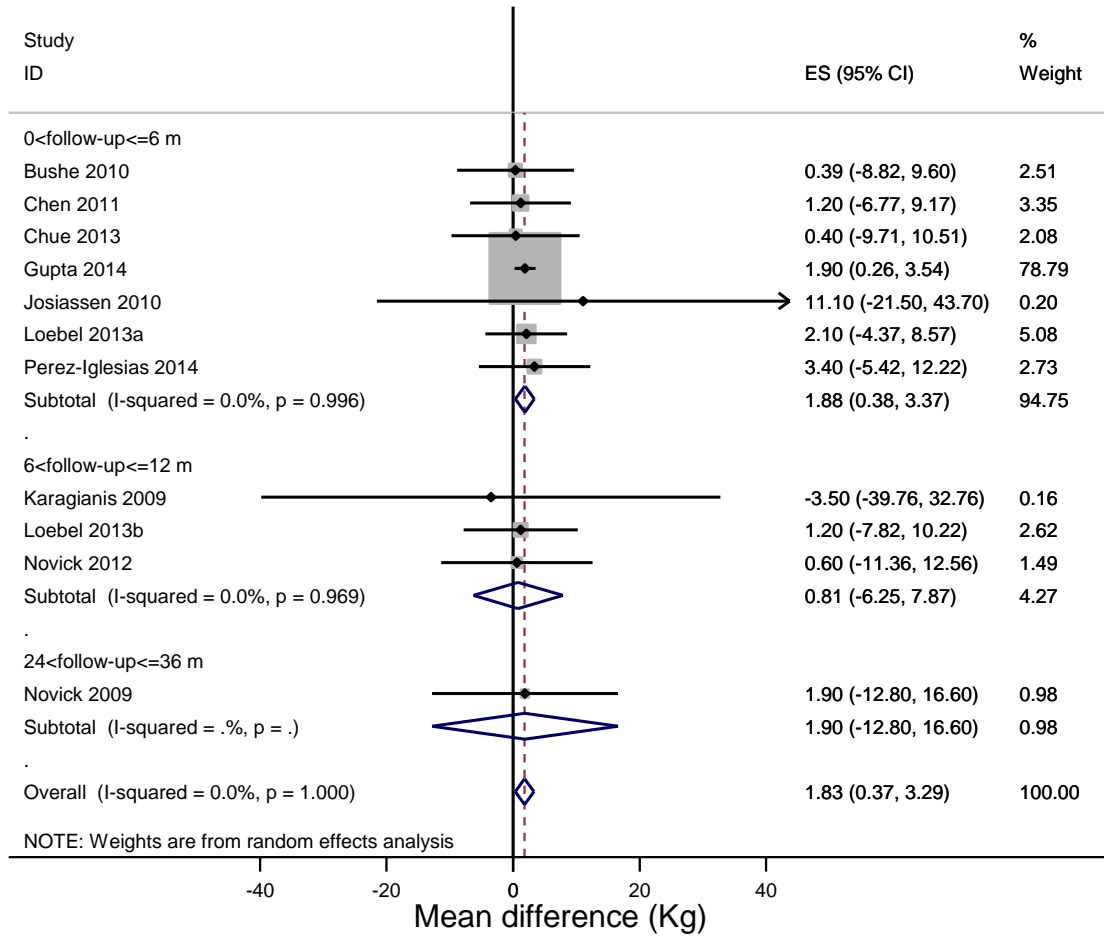

### QUETIAPINE XR - BMI

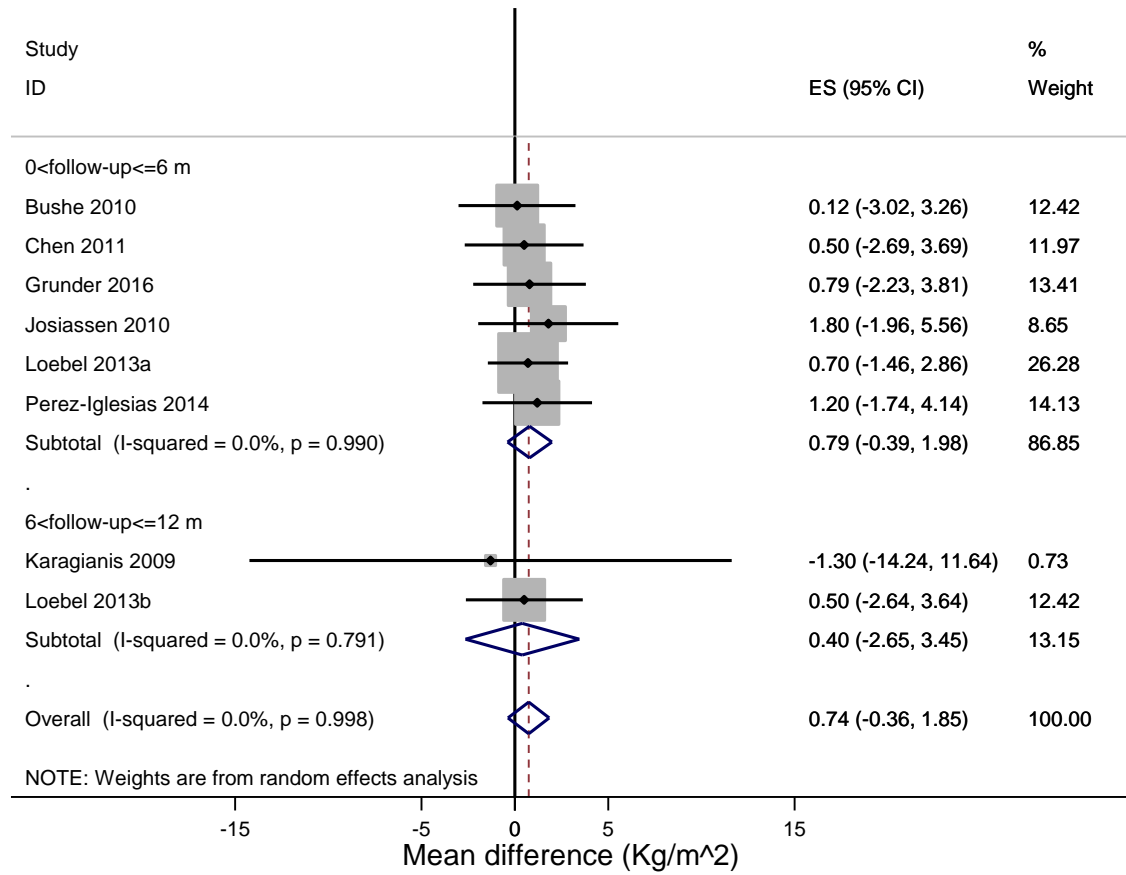

QUETIAPINE XR - Total cholesterol

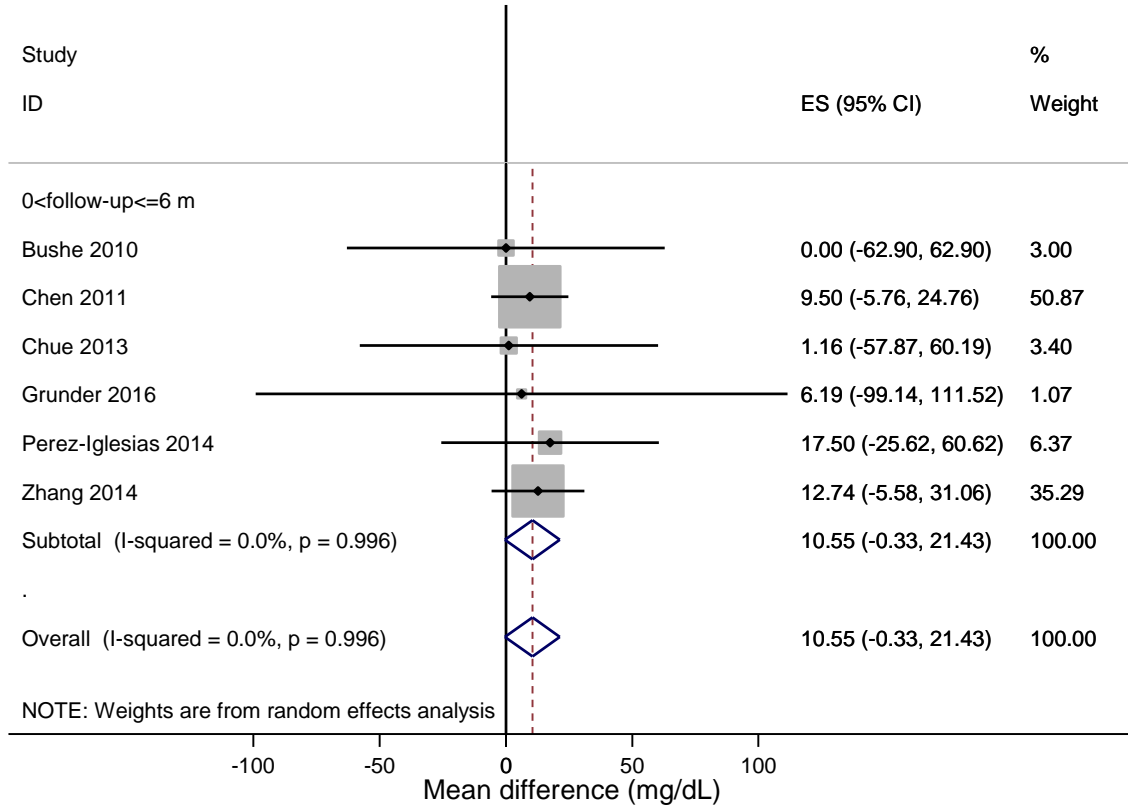

### QUETIAPINE XR - Cholesterol HDL

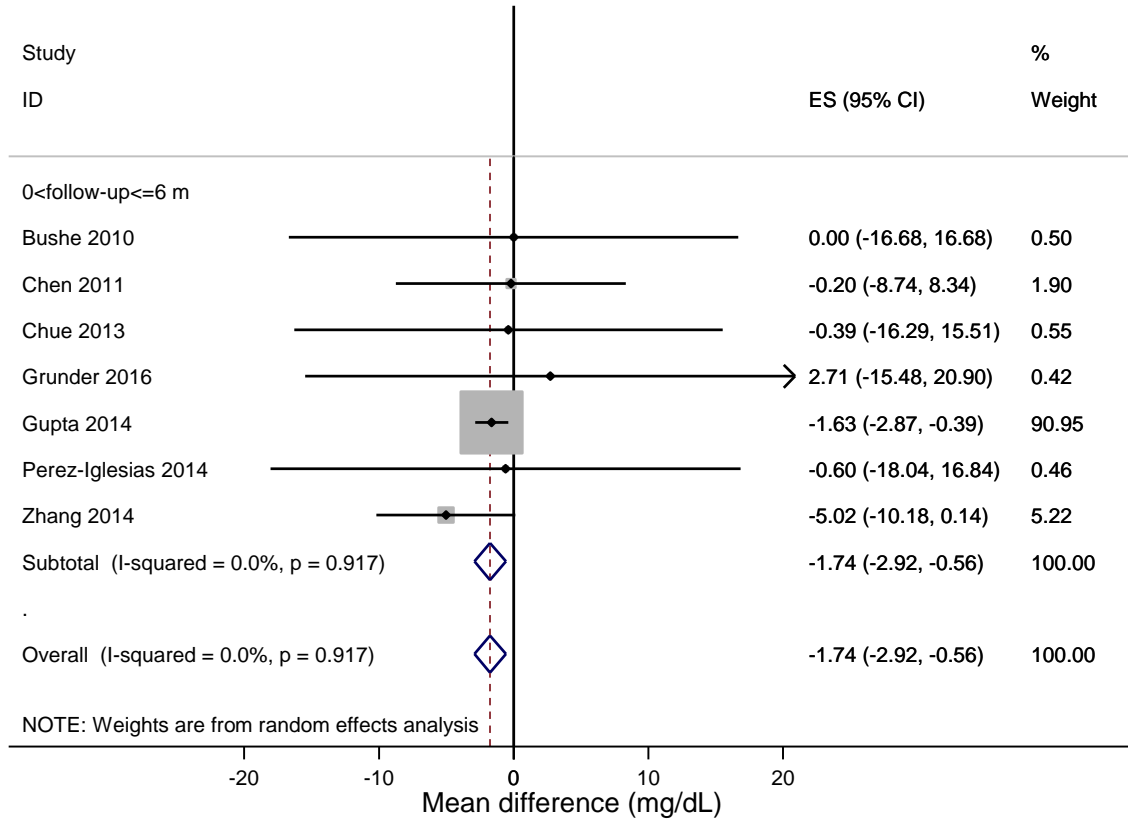

### QUETIAPINE XR - Triglycerides

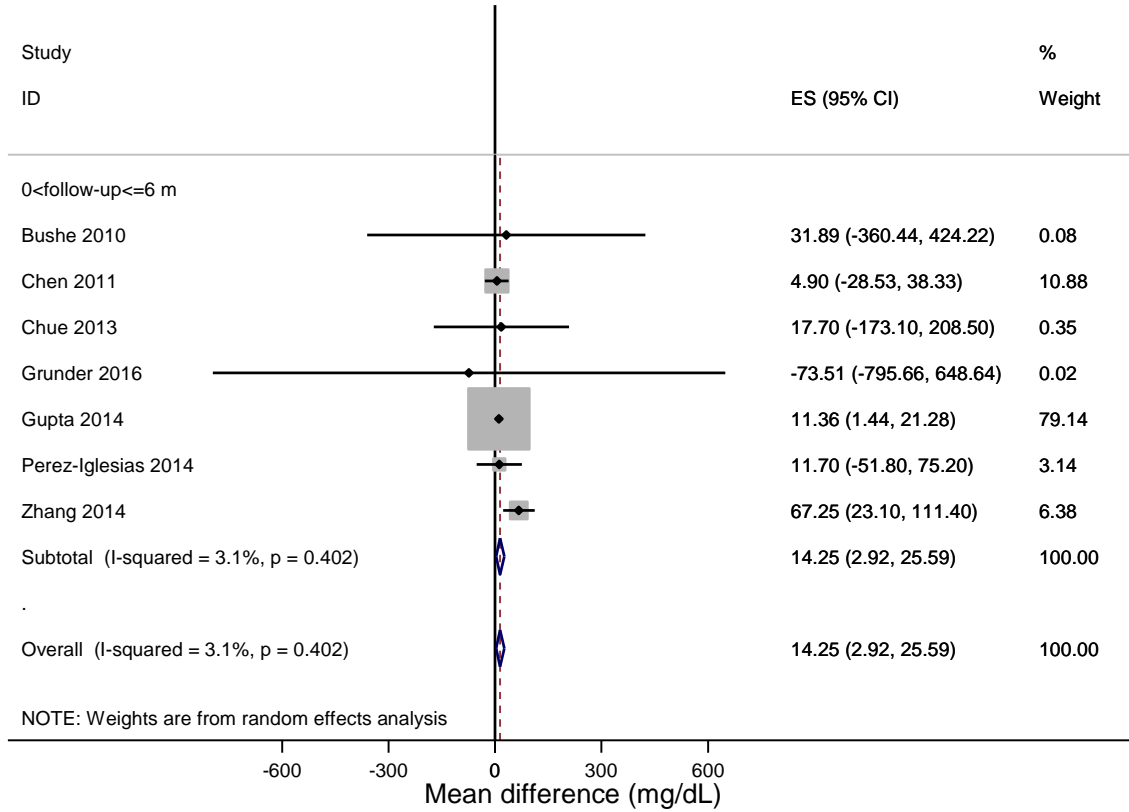

### QUETIAPINE XR - Fasting glucose

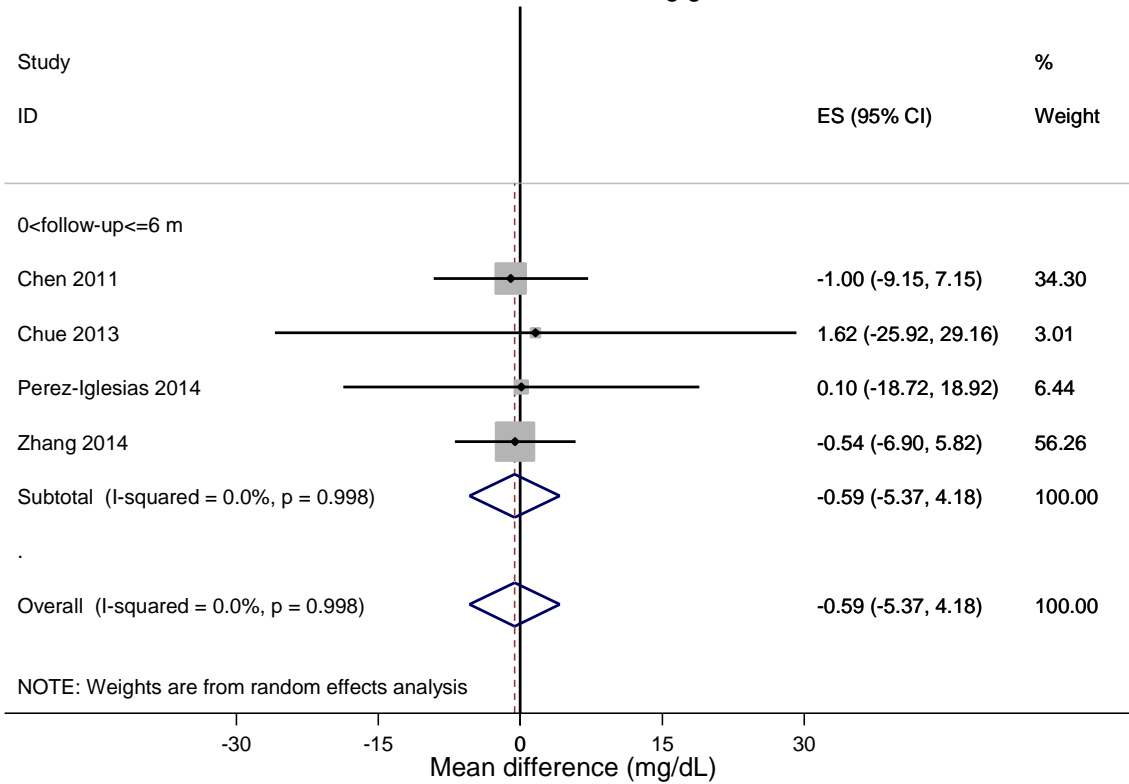



QUETIAPINE XR - Systolic Blood Pressure

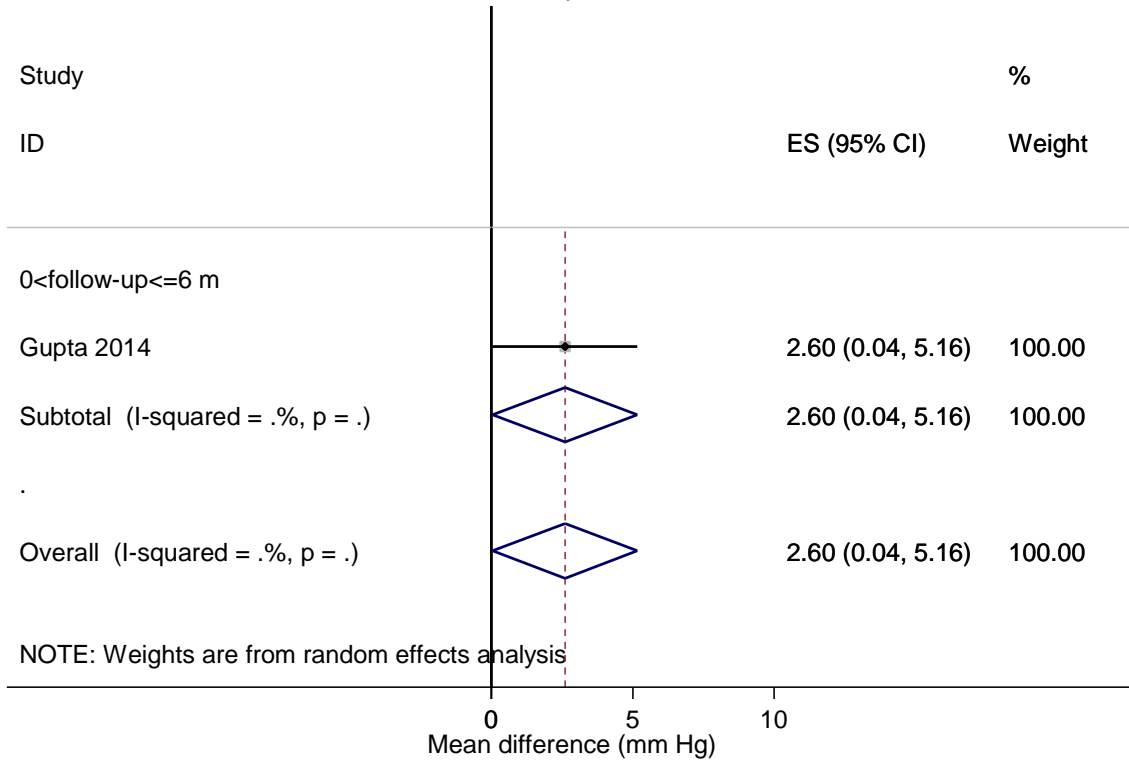

QUETIAPINE XR - Diastolic Blood Pressure

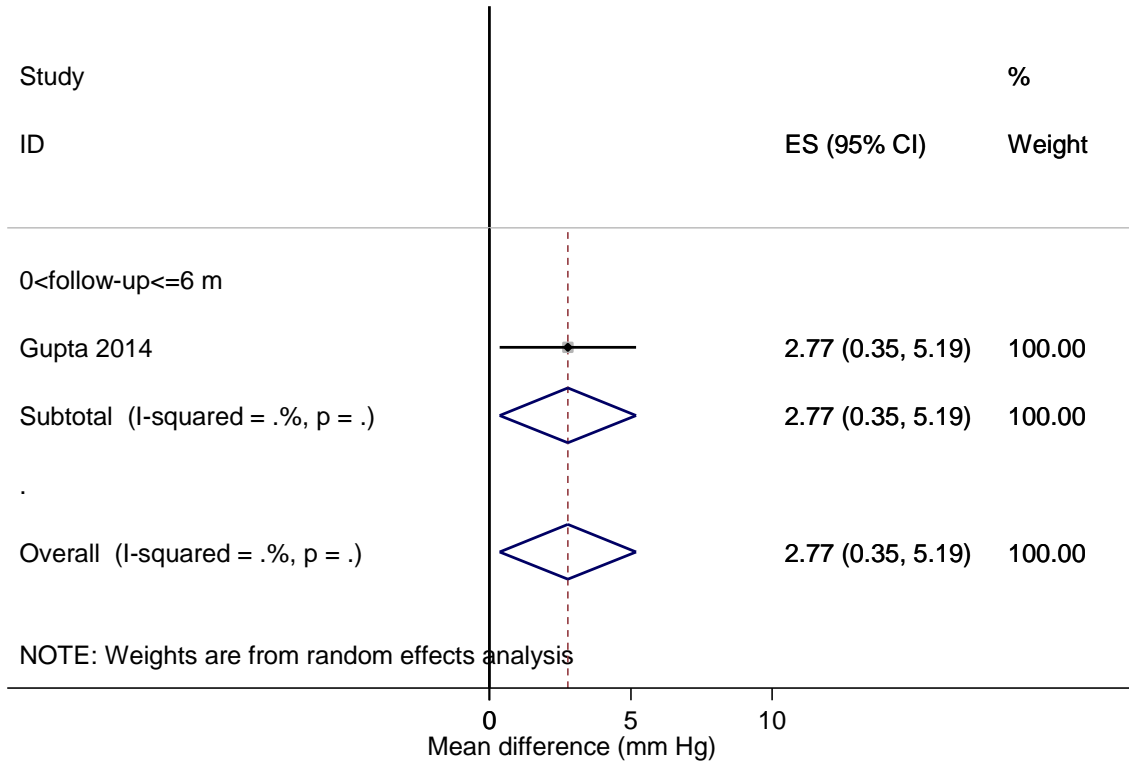

## RISPERIDONE - Weight

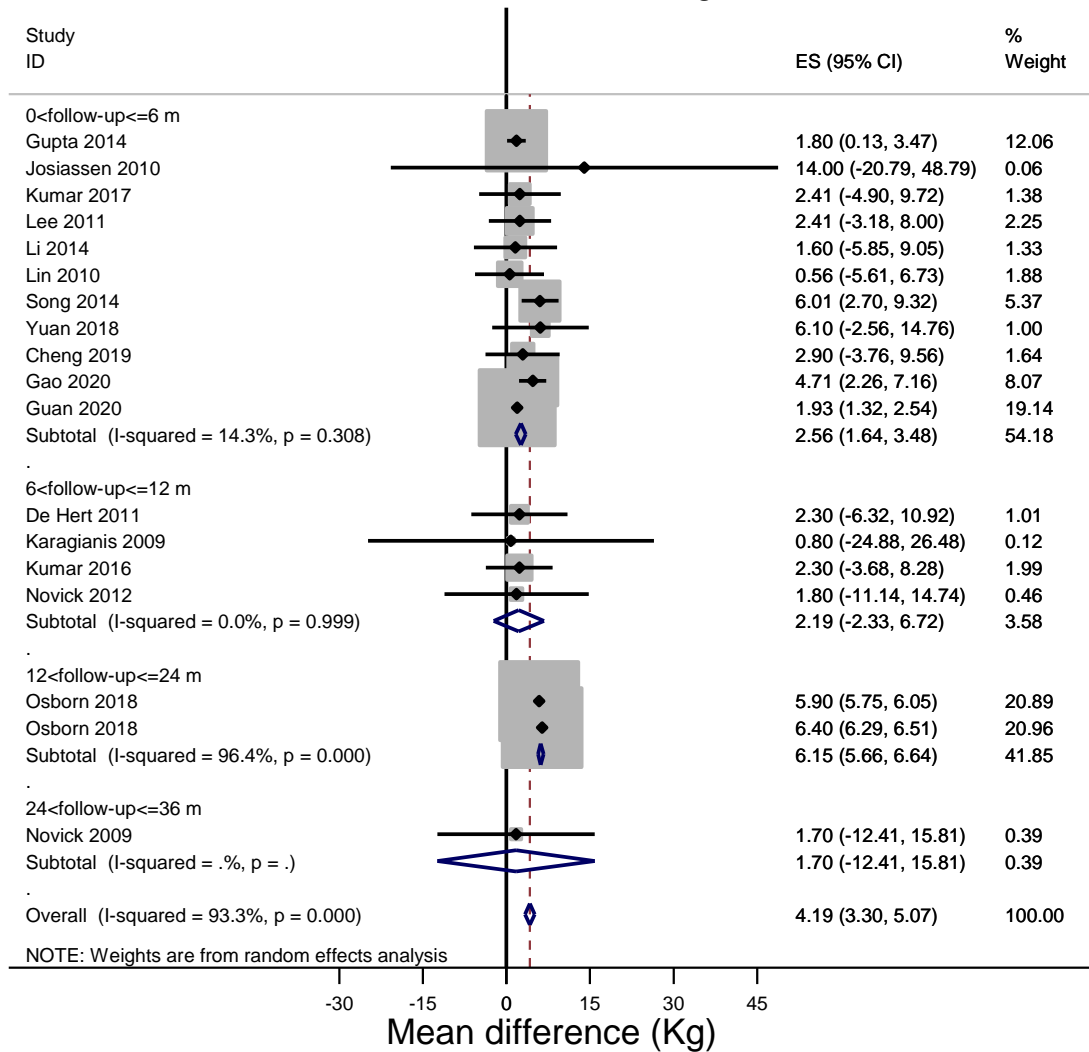

### RISPERIDONE - BMI

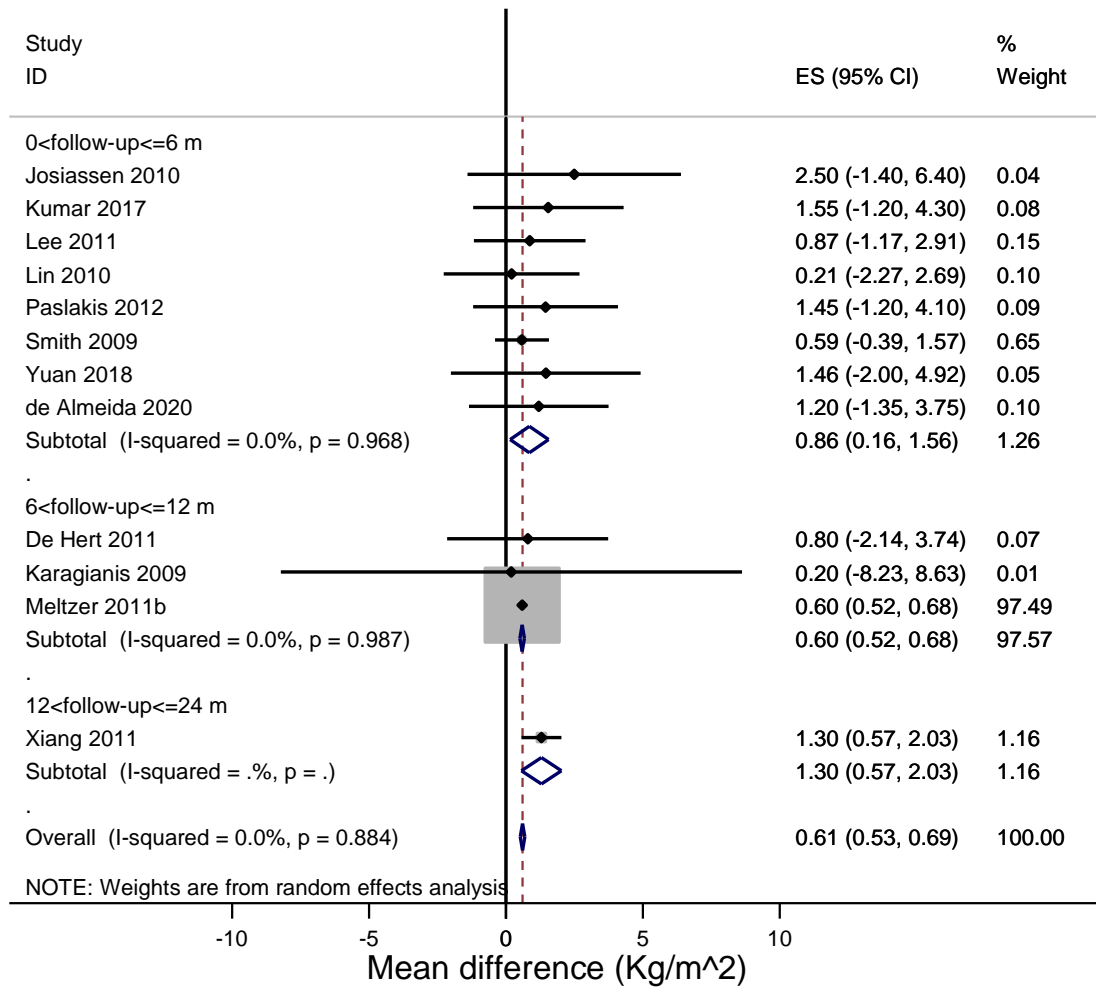

### RISPERIDONE - Total cholesterol

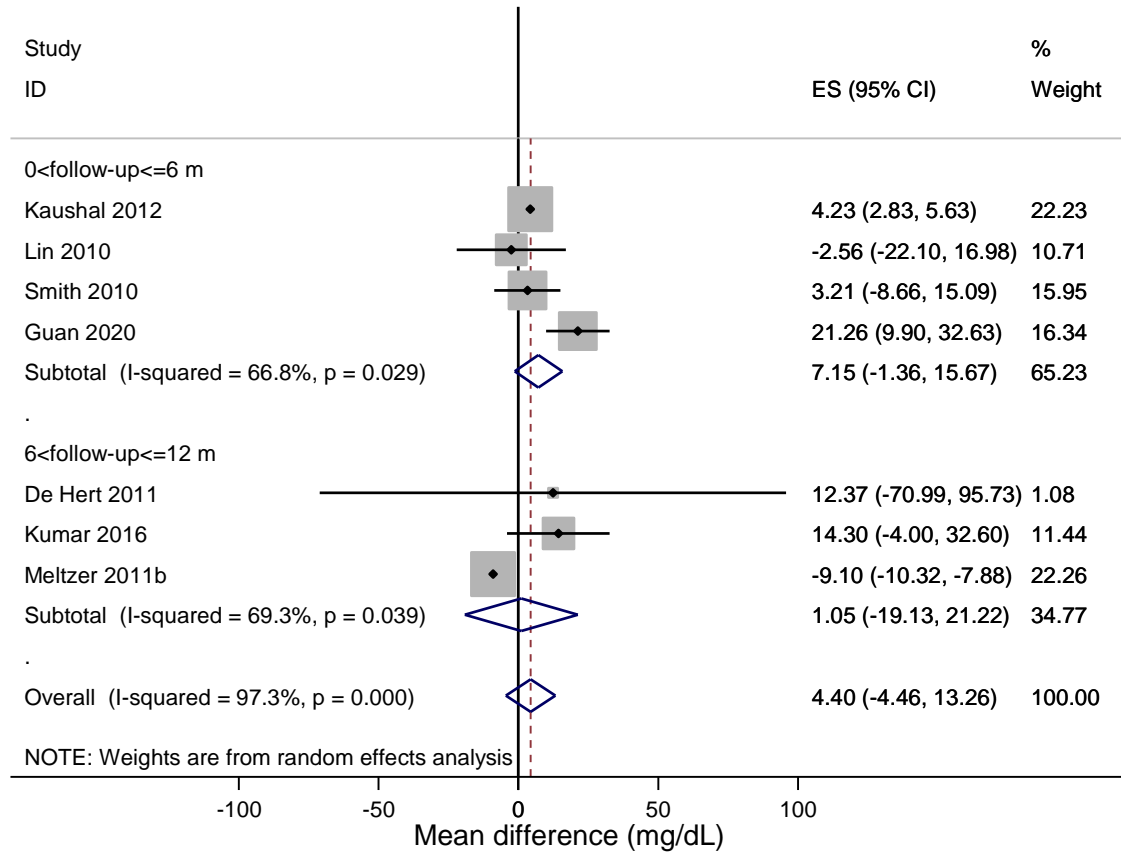

### RISPERIDONE - Cholesterol HDL

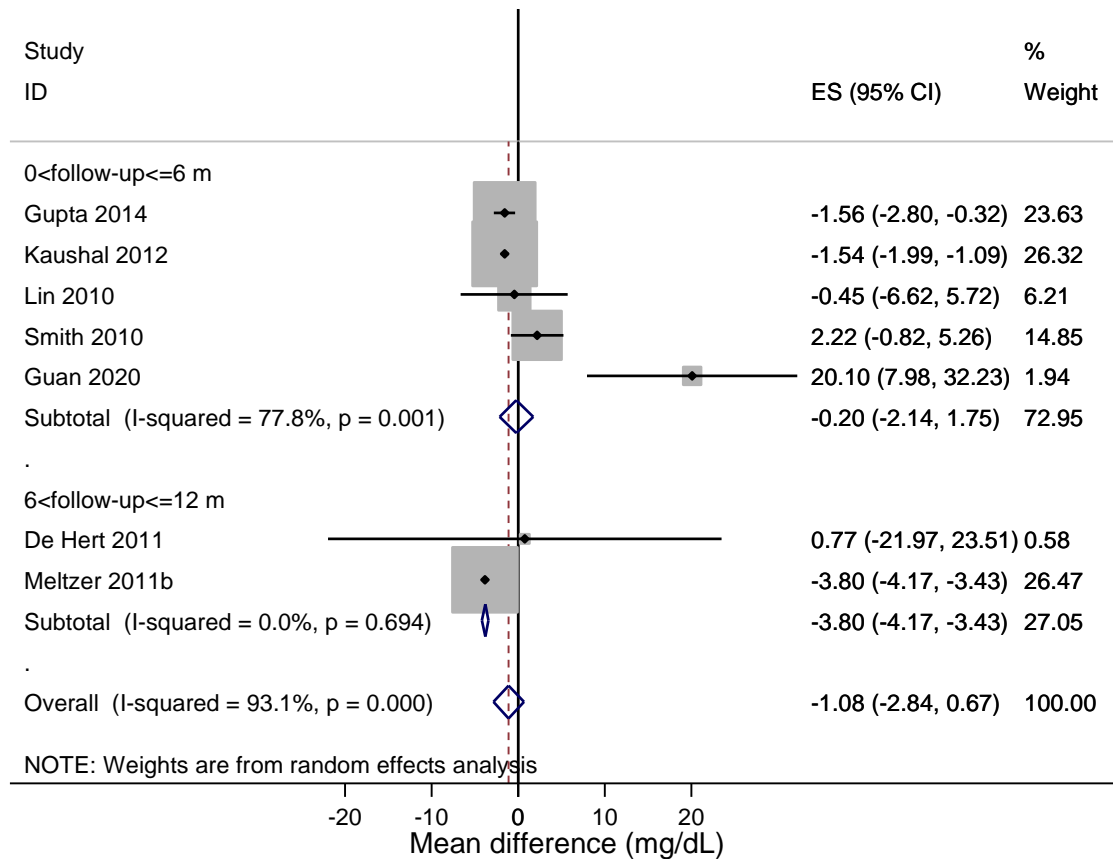

### RISPERIDONE - Triglycerides

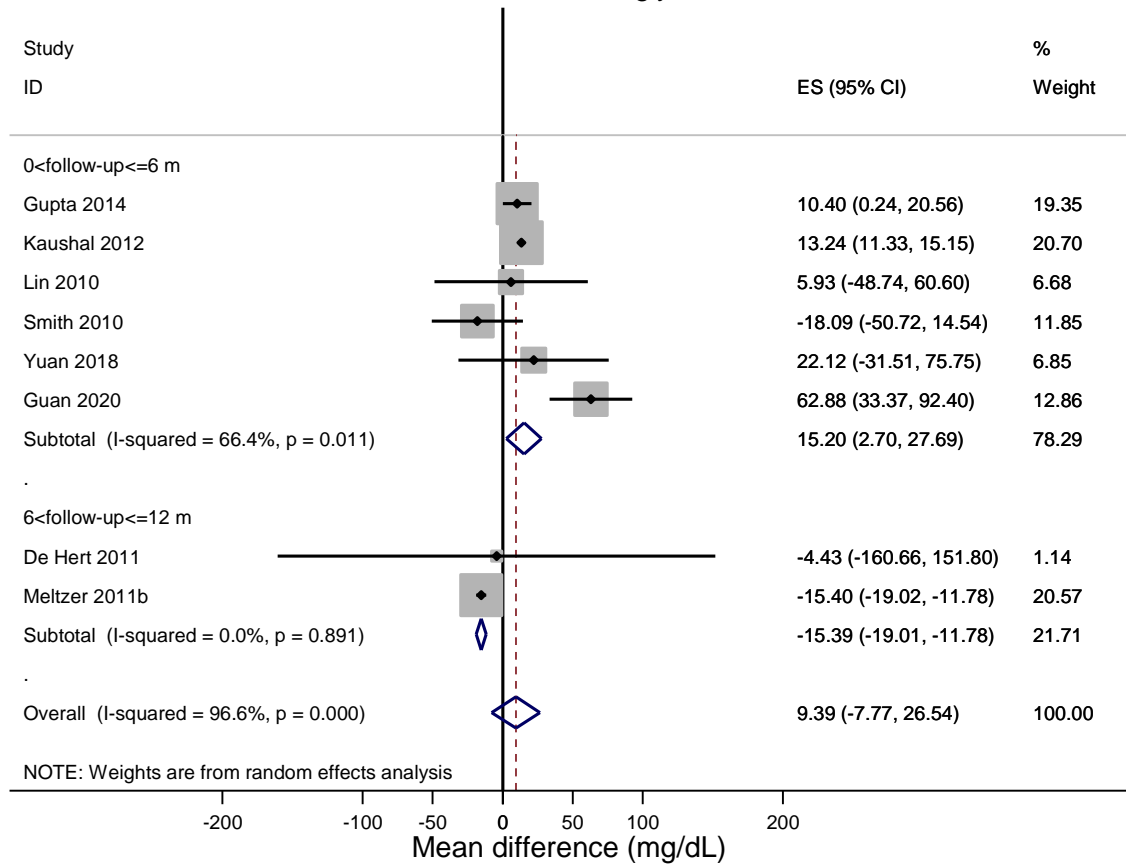

### RISPERIDONE - Fasting glucose

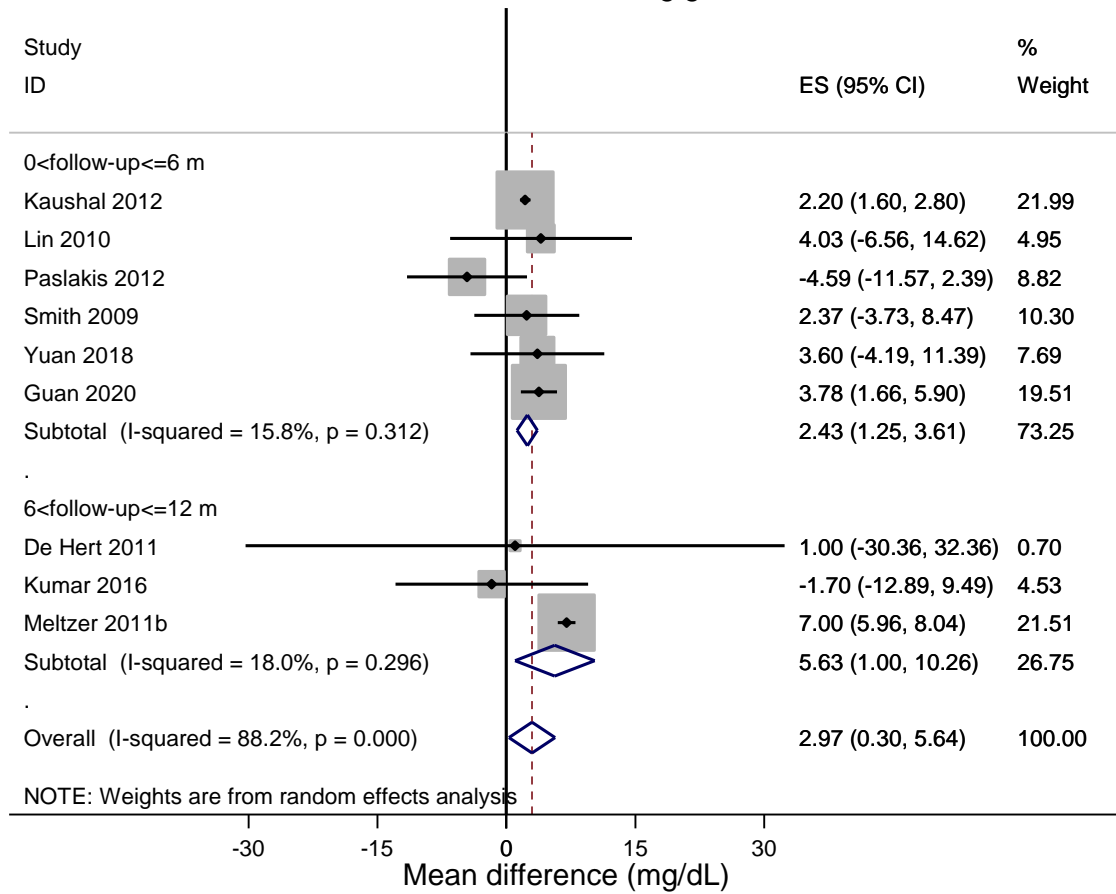

### RISPERIDONE - Systolic Blood Pressure

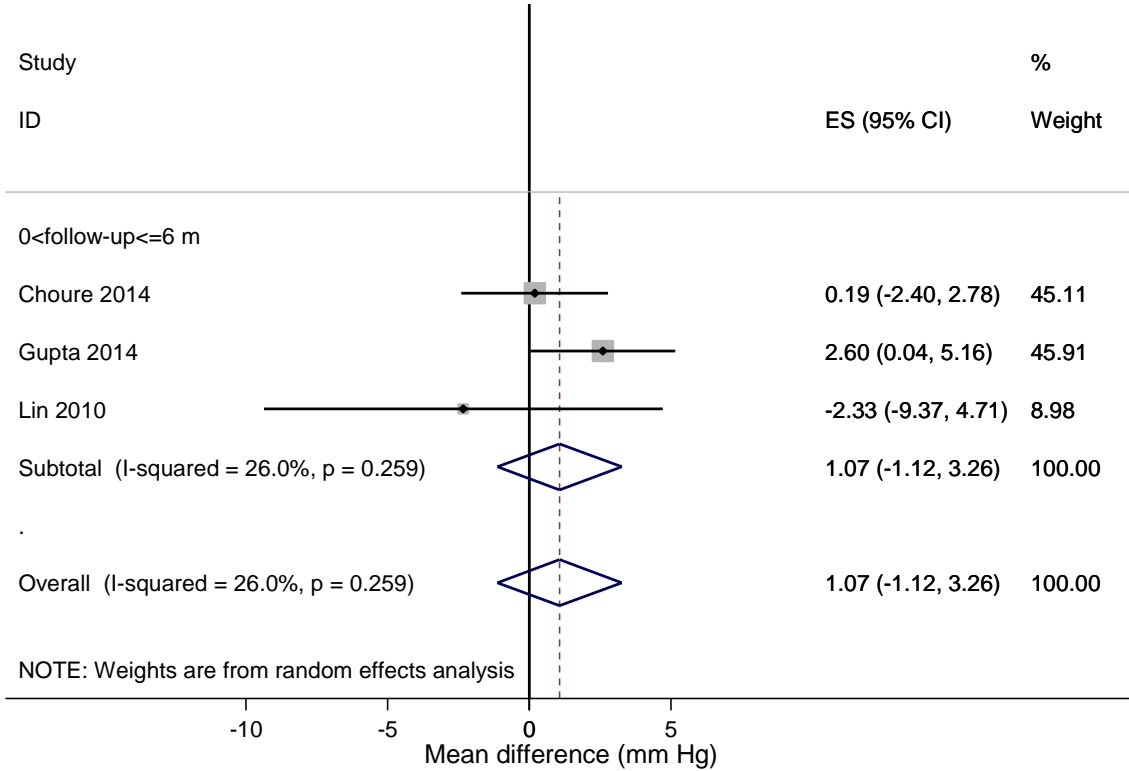

### RISPERIDONE - Diastolic Blood Pressure

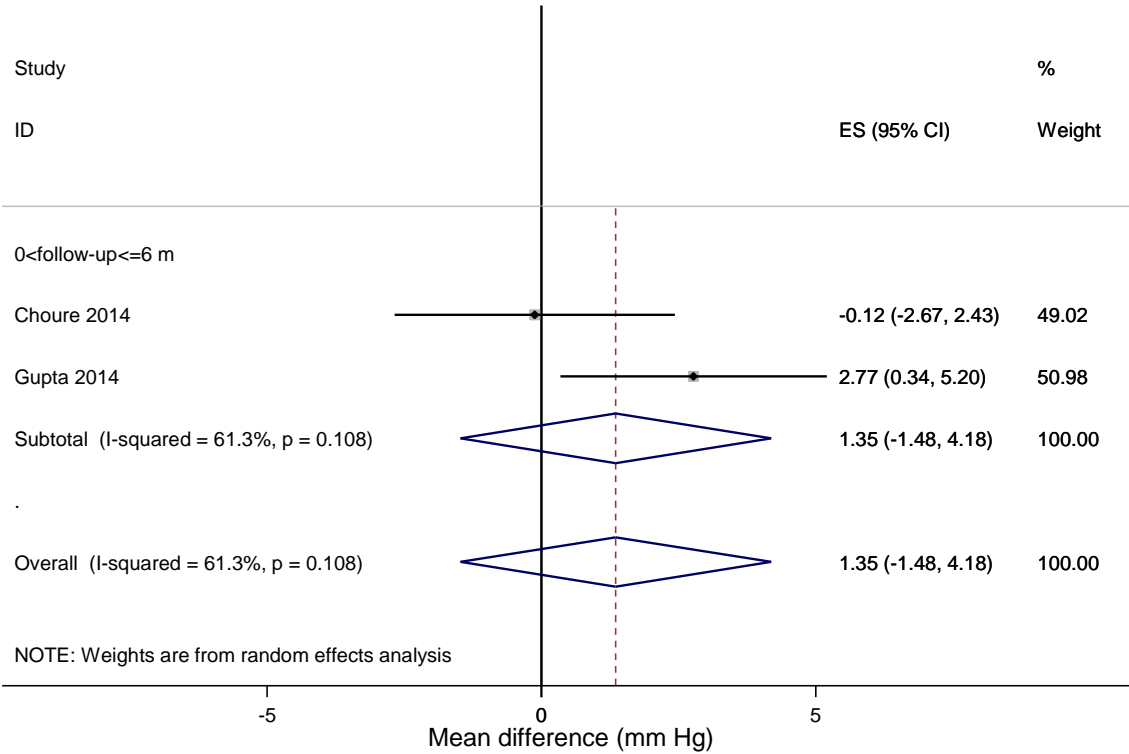



## Clinical Drug Investigation

### SECOND-GENERATION ANTIPSYCHOTIC DRUGS FOR PATIENTS WITH SCHIZOPHRENIA: SYSTEMATIC LITERATURE REVIEW AND META-ANALYSIS OF METABOLIC AND CARDIOVASCULAR SIDE EFFECTS

Carla Rognoni<sup>1</sup>, Arianna Bertolani<sup>1</sup>, Claudio Jommi<sup>1</sup>

<sup>1</sup> Centre for Research on Health and Social Care Management (CERGAS), SDA Bocconi School of Management, Bocconi University, Milan, Italy

Supplementary Table 1 - Metabolic parameters derived by the considered studies

| Study                   | Drug         | Weight (kg) |      | BMI (kg/m <sup>2</sup> ) |      | Total cholesterol (mg/dL) |       | HDL cholesterol (mg/dL) |       | Triglycerides (mg/dL) |       | Fasting Glucose (mg/dL) |       | Systolic blood pressure (mm Hg) |      | Diastolic blood pressure (mm Hg) |      |
|-------------------------|--------------|-------------|------|--------------------------|------|---------------------------|-------|-------------------------|-------|-----------------------|-------|-------------------------|-------|---------------------------------|------|----------------------------------|------|
|                         |              | Δ           | SE   | Δ                        | SE   | Δ                         | SE    | Δ                       | SE    | Δ                     | SE    | Δ                       | SE    | Δ                               | SE   | Δ                                | SE   |
| Josiassen 2010[28]      | aripiprazole | 9.70        | 8.00 | 1.70                     | 0.66 |                           |       |                         |       |                       |       |                         |       |                                 |      |                                  |      |
| Lee 2010[29]            | aripiprazole | 1.60        | 4.23 |                          |      |                           |       |                         |       |                       |       | -6.00                   | 5.17  |                                 |      |                                  |      |
| Lee 2011[30]            | aripiprazole | 2.38        | 4.53 | 0.87                     | 1.63 |                           |       |                         |       |                       |       |                         |       |                                 |      |                                  |      |
| Zhang 2012[31]          | aripiprazole | 3.10        | 1.30 | 2.10                     | 0.83 | 1.93                      |       | 1.16                    |       | -15.04                |       | 10.81                   |       |                                 |      |                                  |      |
| Jindal 2013[33]         | aripiprazole |             |      |                          |      | 2.50                      | 23.75 |                         |       | 0.19                  | 31.48 |                         |       |                                 |      |                                  |      |
| Takekita 2013[32]       | aripiprazole | 0.00        | 0.00 |                          |      |                           |       |                         |       |                       |       |                         |       |                                 |      |                                  |      |
| Gupta 2014[36]          | aripiprazole | 0.98        | 0.90 |                          |      |                           |       | -1.13                   | 0.98  | 5.86                  | 4.18  |                         |       | 0.84                            | 2.09 | 1.00                             | 2.04 |
| Adams 2014[35]          | aripiprazole | 0.40        | 0.60 | 0.20                     | 0.20 |                           |       |                         |       |                       |       |                         |       |                                 |      |                                  |      |
| Li 2014[34]             | aripiprazole | 0.80        | 2.30 |                          |      |                           |       |                         |       |                       |       |                         |       |                                 |      |                                  |      |
| Perez-Iglesias 2014[38] | aripiprazole | 4.30        | 4.80 | 1.50                     | 1.70 | 12.60                     | 28.40 | 1.30                    | 13.50 | 1.00                  | 45.40 | -4.20                   | 37.10 |                                 |      |                                  |      |
| Zhang 2014[37]          | aripiprazole |             |      |                          |      | 0.00                      | 7.73  | -0.78                   | 2.47  | 18.58                 | 12.01 | 1.62                    | 5.30  |                                 |      |                                  |      |
| Gründer 2016[39]        | aripiprazole |             |      | 0.34                     | 1.21 | 0.00                      | 33.63 | 0.77                    | 9.67  | -1.77                 | 68.20 |                         |       |                                 |      |                                  |      |
| Kishi 2016[41]          | aripiprazole | 1.47        | 3.23 |                          |      |                           |       |                         |       |                       |       |                         |       |                                 |      |                                  |      |
| Malla 2016[40]          | aripiprazole |             |      |                          |      | 8.85                      | 6.49  | -1.16                   | 2.95  | 19.47                 | 17.26 | 0.18                    | 5.15  |                                 |      |                                  |      |
| Kumar 2017[42]          | aripiprazole | -0.65       | 4.91 | 0.33                     | 1.58 |                           |       |                         |       |                       |       |                         |       |                                 |      |                                  |      |
| Mustafa 2019[45]        | aripiprazole | 3.50        | 2.20 |                          |      |                           |       |                         |       |                       |       |                         |       |                                 |      |                                  |      |
| Turangan 2019[43]       | aripiprazole |             |      |                          |      |                           |       |                         |       |                       |       | -2.73                   | 1.86  |                                 |      |                                  |      |



| Study                   | Drug       | Weight (kg) |       | BMI (kg/m <sup>2</sup> ) |      | Total cholesterol (mg/dL) |       | HDL cholesterol (mg/dL) |       | Triglycerides (mg/dL) |        | Fasting Glucose (mg/dL) |       | Systolic blood pressure (mm Hg) |       | Diastolic blood pressure (mm Hg) |      |
|-------------------------|------------|-------------|-------|--------------------------|------|---------------------------|-------|-------------------------|-------|-----------------------|--------|-------------------------|-------|---------------------------------|-------|----------------------------------|------|
|                         |            |             |       |                          |      |                           |       |                         |       |                       |        |                         |       |                                 |       |                                  |      |
| Smith 2009[61]          | olanzapine |             |       | 1.39                     | 0.51 |                           |       |                         |       |                       |        | 7.34                    | 3.15  |                                 |       |                                  |      |
| Bushe 2010[64]          | olanzapine | 1.03        | 5.80  | 0.36                     | 2.00 | 6.57                      | 33.63 | -0.39                   | 10.05 | 39.86                 | 209.03 |                         |       |                                 |       |                                  |      |
| Chiu 2010[63]           | olanzapine | 2.00        | 2.08  | 0.80                     | 0.95 | 13.10                     | 6.04  | -1.10                   | 3.41  | 24.50                 | 16.78  | 2.60                    | 2.58  |                                 |       |                                  |      |
| Gilles 2010[62]         | olanzapine |             |       | 1.30                     | 1.59 |                           |       | -1.10                   | 4.06  | 9.00                  | 30.90  | 3.00                    | 4.38  |                                 |       |                                  |      |
| Josiassen 2010[28]      | olanzapine | 10.70       | 12.23 | 1.80                     | 0.89 |                           |       |                         |       |                       |        |                         |       |                                 |       |                                  |      |
| Smith 2010[65]          | olanzapine |             |       |                          |      | 3.16                      | 6.20  | 0.99                    | 1.60  | -12.61                | 17.10  |                         |       |                                 |       |                                  |      |
| Fernandez-Egea 2011[69] | olanzapine | 7.80        | 3.60  |                          |      |                           |       |                         |       |                       |        |                         |       |                                 |       |                                  |      |
| Grootens 2011[67]       | olanzapine | 6.80        | 4.10  |                          |      | 18.56                     | 27.84 |                         |       | 36.31                 | 88.57  | 1.00                    | 16.00 | 0.70                            | 15.30 | 0.70                             | 9.20 |
| Krakowski 2011[66]      | olanzapine |             |       |                          |      | 7.43                      | 38.20 |                         |       |                       |        |                         |       |                                 |       |                                  |      |
| Lee 2011[30]            | olanzapine | 3.80        | 3.89  | 1.40                     | 1.46 |                           |       |                         |       |                       |        |                         |       |                                 |       |                                  |      |
| Meltzer 2011b[68]       | olanzapine |             |       | 2.00                     | 0.04 | 11.90                     | 0.60  | 1.60                    | 0.18  | 45.60                 | 1.77   | 9.80                    | 0.51  |                                 |       |                                  |      |
| Meltzer 2011a[48]       | olanzapine | 4.10        | 4.30  | 1.40                     | 1.40 | 9.60                      | 31.20 | -2.10                   | 9.30  | 50.00                 | 115.00 | 10.30                   | 34.80 |                                 |       |                                  |      |
| Raposo 2011[70]         | olanzapine | 7.00        | 3.68  | 2.50                     | 1.16 | 19.00                     | 9.39  | -9.00                   | 3.84  | 35.00                 | 11.44  |                         |       |                                 |       |                                  |      |
| Alvarez 2012[78]        | olanzapine | 5.40        | 2.40  | 1.80                     |      |                           |       |                         |       |                       |        |                         |       |                                 |       |                                  |      |
| Buchanan 2012[76]       | olanzapine | 2.90        | 0.40  |                          |      |                           |       |                         |       |                       |        |                         |       |                                 |       |                                  |      |
| Buchanan 2012[76]       | olanzapine | 2.60        | 0.40  |                          |      |                           |       |                         |       |                       |        |                         |       |                                 |       |                                  |      |
| Kaushal 2012[74]        | olanzapine |             |       |                          |      | 12.54                     | 0.60  | -3.20                   | 0.28  | 30.36                 | 0.98   | 4.40                    | 0.43  |                                 |       |                                  |      |
| Kusumi 2012[72]         | olanzapine |             |       |                          |      | 10.00                     | 26.10 | -1.60                   | 10.60 | 25.60                 | 68.50  | 0.30                    | 12.10 |                                 |       |                                  |      |
| Li 2012[34]             | olanzapine | 6.26        | 3.91  | 2.35                     | 1.64 |                           |       |                         |       |                       |        |                         |       |                                 |       |                                  |      |
| Novick 2012[73]         | olanzapine | 3.20        | 8.50  |                          |      |                           |       |                         |       |                       |        |                         |       |                                 |       |                                  |      |
| Paslakis 2012[71]       | olanzapine |             |       | 1.11                     | 2.58 |                           |       |                         |       |                       |        | -3.99                   | 6.79  |                                 |       |                                  |      |
| Schloemaker 2012[77]    | olanzapine | 5.40        | 1.78  |                          |      |                           |       |                         |       |                       |        |                         |       |                                 |       |                                  |      |
| Schreiner 2012[75]      | olanzapine | 4.60        |       | 1.40                     |      |                           |       | -1.80                   | 1.13  | 33.40                 | 8.54   |                         |       |                                 |       |                                  |      |
| Hu 2013[80]             | olanzapine | 4.66        | 4.08  | 1.63                     | 1.22 | 24.74                     | 9.64  | 3.48                    | 3.60  | 49.60                 | 38.43  | 5.00                    | 3.24  |                                 |       |                                  |      |
| Jindal 2013[33]         | olanzapine |             |       |                          |      | 11.59                     | 59.12 |                         |       | 5.44                  | 54.98  |                         |       |                                 |       |                                  |      |
| Ou 2013[79]             | olanzapine | 4.23        | 1.31  | 1.59                     | 0.36 | 18.20                     | 36.29 | 4.25                    | 13.51 | 31.90                 | 64.61  | 6.67                    | 10.63 | 0.34                            | 7.38  | -0.51                            | 5.29 |
| Choure 2014[82]         | olanzapine |             |       |                          |      |                           |       |                         |       |                       |        |                         |       | 0.63                            | 1.30  | -3.00                            | 1.78 |





| Study               | Drug                                   | Weight (kg) |      | BMI (kg/m <sup>2</sup> ) |      | Total cholesterol (mg/dL) |       | HDL cholesterol (mg/dL) |      | Triglycerides (mg/dL) |        | Fasting Glucose (mg/dL) |       | Systolic blood pressure (mm Hg) |  | Diastolic blood pressure (mm Hg) |  |
|---------------------|----------------------------------------|-------------|------|--------------------------|------|---------------------------|-------|-------------------------|------|-----------------------|--------|-------------------------|-------|---------------------------------|--|----------------------------------|--|
|                     |                                        |             |      |                          |      |                           |       |                         |      |                       |        |                         |       |                                 |  |                                  |  |
| Song 2014[104]      | risperidone                            | 6.01        | 1.69 |                          |      |                           |       |                         |      |                       |        |                         |       |                                 |  |                                  |  |
| Kumar 2016[85]      | risperidone                            | 2.30        | 3.05 |                          |      | 14.30                     | 9.34  |                         |      |                       |        | -1.70                   | 5.71  |                                 |  |                                  |  |
| Kumar 2017[42]      | risperidone                            | 2.41        | 3.73 | 1.55                     | 1.40 |                           |       |                         |      |                       |        |                         |       |                                 |  |                                  |  |
| Osborn 2018[89]     | risperidone                            | 5.90        | 0.08 |                          |      |                           |       |                         |      |                       |        |                         |       |                                 |  |                                  |  |
| Osborn 2018[89]     | risperidone                            | 6.40        | 0.05 |                          |      |                           |       |                         |      |                       |        |                         |       |                                 |  |                                  |  |
| Yuan 2018[105]      | risperidone                            | 6.10        | 4.42 | 1.46                     | 1.77 |                           |       |                         |      | 22.12                 | 27.36  | 3.60                    | 3.98  |                                 |  |                                  |  |
| Cheng 2019[44]      | risperidone                            | 2.90        | 3.40 |                          |      |                           |       |                         |      |                       |        |                         |       |                                 |  |                                  |  |
| de Almeida 2020[93] | risperidone                            |             |      | 1.20                     | 1.30 |                           |       |                         |      |                       |        |                         |       |                                 |  |                                  |  |
| Gao 2020[47]        | risperidone                            | 4.71        | 1.25 |                          |      |                           |       |                         |      |                       |        |                         |       |                                 |  |                                  |  |
| Guan 2020[95]       | risperidone                            | 1.93        | 0.31 |                          |      | 21.26                     | 5.80  | 20.10                   | 6.19 | 62.88                 | 15.06  | 3.78                    | 1.08  |                                 |  |                                  |  |
| Patel 2020[58]      | risperidone flexibly dosed, 2–6 mg/day | 1.50        | 5.10 | 0.60                     | 1.80 | -2.70                     | 36.70 | -2.00                   | 9.40 | 9.70                  | 106.20 | 4.40                    | 19.00 |                                 |  |                                  |  |

Δ: difference, SE: standard error, BMI: body mass index

## Clinical Drug Investigation

### SECOND-GENERATION ANTIPSYCHOTIC DRUGS FOR PATIENTS WITH SCHIZOPHRENIA: SYSTEMATIC LITERATURE REVIEW AND META-ANALYSIS OF METABOLIC AND CARDIOVASCULAR SIDE EFFECTS

Carla Rognoni<sup>1</sup>, Arianna Bertolani<sup>1</sup>, Claudio Jommi<sup>1</sup>

<sup>1</sup> Centre for Research on Health and Social Care Management (CERGAS), SDA Bocconi School of Management, Bocconi University, Milan, Italy

Supplementary Table 2 – Appraisal of risk of bias and level of evidence of the considered studies

#### Randomized Controlled Trials:

1. Was true randomization used for assignment of participants to treatment groups?
2. Was allocation to treatment groups concealed?
3. Were treatment groups similar at the baseline?
4. Were participants blind to treatment assignment?
5. Were those delivering treatment blind to treatment assignment?
6. Were outcomes assessors blind to treatment assignment?
7. Were treatment groups treated identically other than the intervention of interest?
8. Was follow up complete and if not, were differences between groups in terms of their follow up adequately described and analyzed?
9. Were participants analyzed in the groups to which they were randomized (Intention to treat analysis)?
10. Were outcomes measured in the same way for treatment groups?
11. Were outcomes measured in a reliable way?
12. Was appropriate statistical analysis used?











## Clinical Drug Investigation

### SECOND-GENERATION ANTIPSYCHOTIC DRUGS FOR PATIENTS WITH SCHIZOPHRENIA: SYSTEMATIC LITERATURE REVIEW AND META-ANALYSIS OF METABOLIC AND CARDIOVASCULAR SIDE EFFECTS

Carla Rognoni<sup>1</sup>, Arianna Bertolani<sup>1</sup>, Claudio Jommi<sup>1</sup>

<sup>1</sup> Centre for Research on Health and Social Care Management (CERGAS), SDA Bocconi School of Management, Bocconi University, Milan, Italy

Supplementary Table 3 – Scenario analysis performed considering only data from RCTs

| Parameter                   | Drug                 |                       |                       |                       |                       |                       |
|-----------------------------|----------------------|-----------------------|-----------------------|-----------------------|-----------------------|-----------------------|
|                             | Aripiprazole         | Lurasidone            | Olanzapine            | Paliperidone XR       | Quetiapine XR         | Risperidone           |
| Δ Weight (Kg)               | 3.34 (-0.65, 7.34)   | 0.42 (-0.95, 1.79)    | 3.53* (2.89, 4.18)    | 0.53 (-1.70, 2.76)    | 1.86 (-2.19, 5.92)    | 1.89 (-1.15, 4.93)    |
| Δ BMI (Kg/m <sup>2</sup> )  | 1.68 (-0.45, 3.81)   | -0.10 (-0.36, 0.16)   | 1.54* (0.74, 2.34)    | 0.44 (-0.69, 1.58)    | 0.68 (-0.56, 1.93)    | 0.61* (0.53, 0.69)    |
| Δ Total cholesterol (mg/dL) | 11.78 (-4.58, 28.14) | -8.01 (-9.45, -6.57)  | 11.83* (7.96, 15.69)  | 14.69 (-1.54, 30.92)  | 12.42 (-3.68, 28.51)  | 1.05 (-8.40, 10.50)   |
| Δ Cholesterol HDL (mg/dL)   | 0.59 (-2.21, 3.40)   | -2.05* (-2.47, -1.63) | -1.45 (-3.23, 0.32)   | 0.49 (-1.75, 2.72)    | -3.84 (-8.43, 0.74)   | -1.51 (-3.49, 0.46)   |
| Δ Triglycerides             | 27.55* (0.77, 54.33) | -5.33* (-6.55, -4.10) | 28.23* (14.69, 41.76) | 18.31 (-22.07, 58.70) | 48.70* (12.65, 84.75) | -3.69 (-26.38, 19.00) |

|                                    |                    |                      |                     |                     |                     |                     |
|------------------------------------|--------------------|----------------------|---------------------|---------------------|---------------------|---------------------|
| (mg/dL)                            |                    |                      |                     |                     |                     |                     |
| Δ Fasting glucose (mg/dL)          | 4.86* (1.04, 8.68) | 1.78 (-18.39, 21.96) | 7.59* (4.93, 10.25) | 5.00 (-0.31, 10.31) | -0.47 (-6.50, 5.55) | 3.61* (0.00, 7.22)  |
| Δ Systolic blood pressure (mm Hg)  | -                  | -0.61 (-1.32, 0.10)  | 1.38 (-5.18, 7.93)  | -                   | -                   | -2.33 (-9.37, 4.71) |
| Δ Diastolic blood pressure (mm Hg) | -                  | 0.13 (-0.24, 0.50)   | 0 (-0.41, 0.41)     | -                   | -                   | -                   |

BMI: body mass index, \* statistical significance

## Clinical Drug Investigation

### SECOND-GENERATION ANTIPSYCHOTIC DRUGS FOR PATIENTS WITH SCHIZOPHRENIA: SYSTEMATIC LITERATURE REVIEW AND META-ANALYSIS OF METABOLIC AND CARDIOVASCULAR SIDE EFFECTS

Carla Rognoni<sup>1</sup>, Arianna Bertolani<sup>1</sup>, Claudio Jommi<sup>1</sup>

<sup>1</sup> Centre for Research on Health and Social Care Management (CERGAS), SDA Bocconi School of Management, Bocconi University, Milan, Italy

Supplementary Table 4 – Scenario analysis conducted excluding low-quality studies

| Parameter                   | Drug                 |                       |                       |                      |                       |                     |
|-----------------------------|----------------------|-----------------------|-----------------------|----------------------|-----------------------|---------------------|
|                             | Aripiprazole         | Lurasidone            | Olanzapine            | Paliperidone XR      | Quetiapine XR         | Risperidone         |
| Δ Weight (Kg)               | 2.97* (0.38, 5.56)   | 0.43 (-0.93, 1.79)    | 3.81* (3.20, 4.42)    | 0.88 (-0.75, 2.51)   | 1.83* (0.37, 3.29)    | 2.05* (1.50, 2.60)  |
| Δ BMI (Kg/m <sup>2</sup> )  | 1.55 (-0.08, 3.17)   | -0.10 (-0.35, 0.16)   | 1.69* (1.03, 2.35)    | 0.59 (-0.34, 1.53)   | 0.74 (-0.36, 1.85)    | 0.61* (0.53, 0.69)  |
| Δ Total cholesterol (mg/dL) | 11.67 (-0.01, 23.35) | -8.01* (-9.45, -6.57) | 13.24* (9.81, 16.87)  | 14.69 (-1.54, 30.92) | 10.55 (-0.33, 21.43)  | 4.40 (-4.46, 13.26) |
| Δ Cholesterol HDL (mg/dL)   | -0.62 (-2.15, 0.90)  | -2.05* (-2.47, -1.63) | -1.38 (-2.95, 0.20)   | 0.57 (-1.05, 2.19)   | -1.74* (-2.92, -0.56) | -1.08 (-2.84, 0.67) |
| Δ Triglycerides             | 18.63* (1.67, 35.58) | -5.33* (-6.55, -4.10) | 33.45* (21.84, 45.05) | 7.15 (-14.96, 29.25) | 14.25* (2.92, 25.59)  | 9.39 (-7.77, 26.54) |

|                                    |                    |                      |                    |                    |                     |                    |
|------------------------------------|--------------------|----------------------|--------------------|--------------------|---------------------|--------------------|
| (mg/dL)                            |                    |                      |                    |                    |                     |                    |
| Δ Fasting glucose (mg/dL)          | 0.19 (-4.22, 4.59) | 1.78 (-18.39, 21.96) | 6.31* (4.28, 8.34) | 3.20* (0.10, 6.29) | -0.59 (-5.37, 4.18) | 2.97* (0.30, 5.64) |
| Δ Systolic blood pressure (mm Hg)  | 0.84 (-3.25, 4.93) | -0.61 (-1.32, 0.10)  | 1.64 (-1.93, 5.21) | 1.29 (-1.48, 4.06) | 2.60* (0.04, 5.16)  | 1.07 (-1.12, 3.26) |
| Δ Diastolic blood pressure (mm Hg) | 1.00 (-3.01, 5.01) | 0.13 (-0.24, 0.50)   | 0.42 (-1.84, 2.68) | -                  | 2.77* (0.35, 5.19)  | 1.35 (-1.48, 4.18) |

BMI: body mass index, \* statistical significance
